# Supplementary material for: Synthesis, structure, fullerene-binding and resolution of C3-symmetric cavitands with rigid and deep cavities
Source: Royal Society of Chemistry journal article supplement (doi:10.1039/c1ob06465g), 2011-11-17
Supplement: c1ob06465g.pdf [file c1ob06465g.pdf]

Supplementary Material (ESI) for Organic & Biomolecular Chemistry

## Synthesis, structures, fullerene-binding and resolution of $C_3$ -symmetric cavitands with rigid and deeper cavities

Jin-Tao Yu, Zhi-Tang Huang and Qi-Yu Zheng\*

*Beijing National Laboratory for Molecular Sciences, CAS Key Laboratory of Molecular Recognition and Function, Institute of Chemistry, Chinese Academy of Sciences, Beijing 100190, China.*

*E-mail: zhengqy@iccas.ac.cn*

### Table of Contents

|                                                                                    |     |
|------------------------------------------------------------------------------------|-----|
| 1. Characterization data for compound <b>5a-5l</b> , <b>6</b> and diastereoisomers | S2  |
| 2. NMR spectra of compound <b>5a-5l</b> , <b>6</b> and diastereoisomers            | S10 |
| 3. Titration experiment between fullerene and hosts                                | S25 |
| 4. Molecular modeling of <b>5a</b> -C <sub>60</sub>                                | S27 |
| 5. Chiral HPLC trace of compound <b>6</b>                                          | S28 |

## 1. Characterization data for compounds 5a-5i, 6 and diastereoisomers

(±)-2,7,12-trimethoxy-3,8,13-triphenyl-10,15-dihydro-5H-tribenzo[a,d,g]cyclonone (5a):

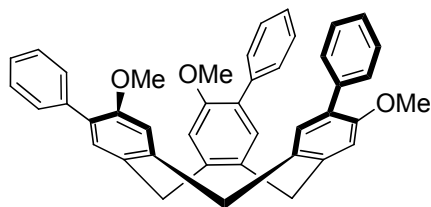

(±)-5a

Mp 282-283 °C; yield: 76%; IR (KBr)  $\nu$  3020, 2935, 1609, 1511, 1486, 1463, 1441, 1390, 1235, 1044, 698  $\text{cm}^{-1}$ ;  $^1\text{H}$  NMR (400 MHz,  $\text{CDCl}_3$ )  $\delta$  7.45 (d,  $J = 7.2$ , 6H, Ph-*H*), 7.42-7.34 (m, 9H, Ph-*H*), 7.31 (t,  $J = 7.2$ , 3H, Ph-*H*), 6.98 (s, 3H, Ar<sub>CTV</sub>-*H*), 4.92 (d,  $J = 13.6$ , 3H, CH<sub>2</sub>), 3.79 (d,  $J = 13.7$ , 3H, CH<sub>2</sub>), 3.73 (s, 9H, OCH<sub>3</sub>);  $^{13}\text{C}$  NMR (100 MHz,  $\text{CDCl}_3$ )  $\delta$  155.5, 140.3, 138.5, 132.6, 131.6, 129.7, 129.6, 128.1, 126.9, 113.0 (ArC), 56.0 (OCH<sub>3</sub>), 36.8 (CH<sub>2</sub>); MS (positive APCI):  $m/z$  589.44 ( $[\text{M}+\text{H}]^+$ ). Anal. calcd. for  $\text{C}_{42}\text{H}_{36}\text{O}_3 \cdot 0.9\text{CHCl}_3$ : C, 74.01; H, 5.34. Found: C, 74.30; H, 5.38.

(±)-2,7,12-trimethoxy-3,8,13-tri(*p*-tolyl)-10,15-dihydro-5H-tribenzo[a,d,g]cyclonone (5b):

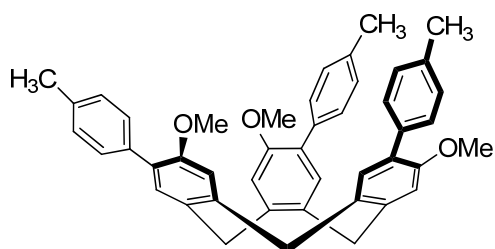

(±)-5b

Mp 158-159°C; yield: 67%; IR (KBr)  $\nu$  3013, 2938, 1608, 1519, 1493, 1464, 1386, 1235, 1043, 816  $\text{cm}^{-1}$ ;  $^1\text{H}$  NMR (400 MHz,  $\text{CDCl}_3$ )  $\delta$  7.34 (d,  $J = 8.0$ , 6H, Tol-*H*), 7.33 (s, 3H, Ar<sub>CTV</sub>-*H*), 7.19 (d,  $J = 8.0$ , 6H, Tol-*H*), 6.95 (s, 3H, Ar<sub>CTV</sub>-*H*), 4.90 (d,  $J = 13.6$ , 3H, CH<sub>2</sub>), 3.78 (d,  $J = 13.6$ , 3H, CH<sub>2</sub>), 3.73 (s, 9H, OCH<sub>3</sub>), 2.37 (s, 9H, Tol-CH<sub>3</sub>);  $^{13}\text{C}$  NMR (100 MHz,  $\text{CDCl}_3$ )  $\delta$  155.5, 140.1, 136.6, 135.6, 132.5, 131.6, 129.7, 129.4, 128.8, 113.0 (ArC), 56.0 (OCH<sub>3</sub>), 36.8 (CH<sub>2</sub>), 21.3 (Tol-CH<sub>3</sub>); MS

(positive APCI):  $m/z$  631.57 ( $[M+H]^+$ ). Anal. calcd. for  $C_{45}H_{42}O_3 \cdot 0.25CHCl_3$ : C, 82.26; H, 6.45. Found: C, 82.11; H, 6.48.

**(±)-3,8,13-tri(4-*tert*-butylphenyl)-2,7,12-trimethoxy-10,15-dihydro-5*H*-tribenzo[*a*,*d*,*g*]cyclonoene (5c):**

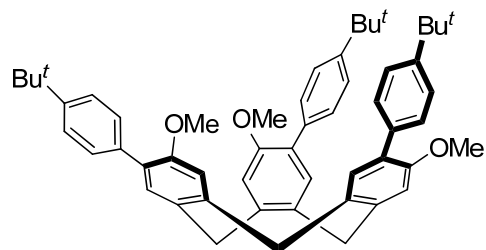

**(±)-5c**

Mp 193-194 °C; yield: 46%; IR (KBr)  $\nu$  2959, 1610, 1494, 1462, 1385, 1238, 1044, 836  $cm^{-1}$ ;  $^1H$  NMR (400 MHz,  $CDCl_3$ )  $\delta$  7.40 (m, 12H, *t*BuPh-*H*), 7.37 (s, 3H, Ar<sub>CTV</sub>-*H*), 6.97 (s, 3H, Ar<sub>CTV</sub>-*H*), 4.90 (d,  $J = 13.6$ , 3H,  $CH_2$ ), 3.78 (s, 9H, OCH<sub>3</sub>), 3.76 (d,  $J = 13.6$ , 3H,  $CH_2$ ), 1.35 (s, 27H, C(CH<sub>3</sub>)<sub>3</sub>);  $^{13}C$  NMR (100 MHz,  $CDCl_3$ )  $\delta$  155.6, 149.7, 140.1, 135.6, 132.6, 131.6, 129.6, 129.2, 125.1, 113.1 (ArC), 56.1 (OCH<sub>3</sub>), 36.9 ( $CH_2$ ), 34.7 (C(CH<sub>3</sub>)<sub>3</sub>), 31.6 (C(CH<sub>3</sub>)<sub>3</sub>); MS (positive APCI):  $m/z$  757.67 ( $[M+H]^+$ ). Anal. calcd. for  $C_{54}H_{60}O_3 \cdot 0.1CHCl_3$ : C, 84.50; H, 7.88. Found: C, 84.81; H, 8.02.

**(±)-2,7,12-trimethoxy-3,8,13-tri(4-methoxyphenyl)-10,15-dihydro-5*H*-tribenzo[*a*,*d*,*g*]cyclonoene (5d):**

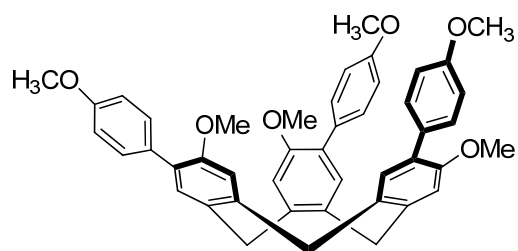

**(±)-5d**

Mp 177-179°C; yield: 65%; IR (KBr)  $\nu$  2934, 2835, 1607, 1558, 1495, 1458, 1245, 901, 836  $cm^{-1}$ ;  $^1H$  NMR (400 MHz,  $CDCl_3$ )  $\delta$  7.38 (d,  $J = 8.4$ , 6H, *p*Anisole-*H*), 7.33 (s, 3H, Ar<sub>CTV</sub>-*H*), 6.94 (d,  $J = 8.4$ , 6H, *p*Anisole-*H*), 6.91 (s, 3H, Ar<sub>CTV</sub>-*H*), 4.90 (d,  $J = 13.6$ , 3H,  $CH_2$ ), 3.83 (s, 9H, OCH<sub>3</sub>), 3.76 (d,  $J = 13.6$ , 3H,  $CH_2$ ), 3.74 (s, 9H,

OCH<sub>3</sub>); <sup>13</sup>C NMR (100 MHz, CDCl<sub>3</sub>) δ 158.8, 155.5, 139.9, 132.4, 131.6, 130.9, 130.6, 129.4, 113.6, 113.0 (ArC), 56.0, 55.4 (OCH<sub>3</sub>), 36.8 (CH<sub>2</sub>); MS (positive APCI): *m/z* 679.40 ([M+H]<sup>+</sup>). Anal. calcd. for C<sub>45</sub>H<sub>42</sub>O<sub>6</sub>: C, 79.62; H, 6.24. Found: C, 79.65; H, 6.44.

**(±)-2,7,12-trimethoxy-3,8,13-tri(3-methoxyphenyl)-10,15-dihydro-5H-tribenzo[a, d,g] cyclonoene (5e):**

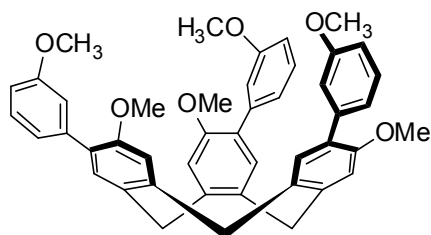

**(±)-5e**

Mp 187-188 °C; yield: 67%; IR (KBr) ν 2992, 2933, 2827, 1597, 1585, 1477, 1464, 1390, 1251, 1038, 850, 699 cm<sup>-1</sup>; <sup>1</sup>H NMR (400 MHz, CDCl<sub>3</sub>) δ 7.36 (s, 3H, Ar<sub>CTV</sub>-H), 7.30 (t, *J* = 7.9, 3H, *m*Anisole-H), 7.05-6.98 (m, 6H, *m*Anisole-H), 6.97 (s, 3H, Ar<sub>CTV</sub>-H), 6.86 (dd, *J* = 8.2, 2.5, 3H, *m*Anisole-H), 4.91 (d, *J* = 13.6, 3H, CH<sub>2</sub>), 3.81 (s, 9H, OCH<sub>3</sub>), 3.79 (d, *J* = 13.6, 3H, CH<sub>2</sub>), 3.75 (s, 9H, OCH<sub>3</sub>); <sup>13</sup>C NMR (100 MHz, CDCl<sub>3</sub>) δ 159.3, 155.5, 140.4, 139.9, 132.5, 131.5, 129.6, 129.0, 122.1, 115.4, 113.0, 112.6 (ArC), 56.0, 55.3 (OCH<sub>3</sub>), 36.8 (CH<sub>2</sub>); MS (positive APCI): *m/z* 679.40 ([M+H]<sup>+</sup>). Anal. calcd. for C<sub>45</sub>H<sub>42</sub>O<sub>6</sub>: C, 79.62; H, 6.24. Found: C, 79.43; H, 6.25.

**(±)-3,8,13-tri(4-fluorophenyl)-2,7,12-trimethoxy-10,15-dihydro-5H-tribenzo[a, d,g] cyclonoene (5f):**

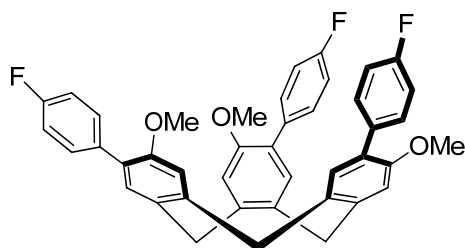

**(±)-5f**

Mp 248-249 °C; yield: 73%; IR (KBr) ν 2933, 2840, 1604, 1518, 1494, 1385, 1158,

1042, 836  $\text{cm}^{-1}$ ;  $^1\text{H}$  NMR (400 MHz,  $\text{CDCl}_3$ )  $\delta$  7.41 (dd,  $J = 8.6, 5.6$ , 6H, FPh-*H*), 7.32 (s, 3H, Ar<sub>CTV</sub>-*H*), 7.07 (t,  $J = 8.6$ , 6H, FPh-*H*), 6.96 (s, 3H, Ar<sub>CTV</sub>-*H*), 4.91 (d,  $J = 13.6$ , 3H,  $\text{CH}_2$ ), 3.78 (d,  $J = 13.8$ , 3H,  $\text{CH}_2$ ), 3.75 (s, 9H,  $\text{OCH}_3$ );  $^{13}\text{C}$  NMR (100 MHz,  $\text{CDCl}_3$ )  $\delta$  163.3, 160.9, 155.4, 140.4, 134.3, 134.3, 132.5, 131.6, 131.1, 131.0, 128.8, 115.1, 114.9, 113.0 (ArC), 56.0 ( $\text{OCH}_3$ ), 36.8 ( $\text{CH}_2$ ); MS (positive APCI):  $m/z$  643.53 ( $[\text{M}+\text{H}]^+$ ). Anal. calcd. for  $\text{C}_{42}\text{H}_{33}\text{F}_3\text{O}_3$ : C, 78.49; H, 5.18. Found: C, 78.59; H, 5.32.

**(±)-3,8,13-tri(4-chlorophenyl)-2,7,12-trimethoxy-10,15-dihydro-5*H*-tribenzo[a,d,g]cycloenoene (5g):**

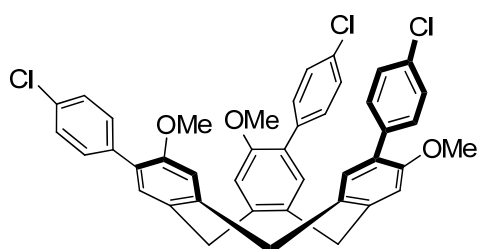

**(±)-5g**

Mp 273-275°C; yield: 5%; IR (KBr)  $\nu$  2931, 2837, 1606, 1508, 1485, 1462, 1382, 1278, 1092, 830  $\text{cm}^{-1}$ ;  $^1\text{H}$  NMR (400 MHz,  $\text{CDCl}_3$ )  $\delta$  7.40-7.32 (m, 12H, ClPh-*H*), 7.31 (s, 3H, Ar<sub>CTV</sub>-*H*), 6.95 (s, 3H, Ar<sub>CTV</sub>-*H*), 4.90 (d,  $J = 13.6$ , 3H,  $\text{CH}_2$ ), 3.78 (d,  $J = 13.6$ , 3H,  $\text{CH}_2$ ), 3.74 (s, 9H,  $\text{OCH}_3$ );  $^{13}\text{C}$  NMR (100 MHz,  $\text{CDCl}_3$ )  $\delta$  155.5, 140.6, 136.8, 133.0, 132.4, 131.6, 130.8, 128.6, 128.3, 113.0 (ArC), 56.0 ( $\text{OCH}_3$ ), 36.8 ( $\text{CH}_2$ ); MS (negative APCI):  $m/z$  690.43 (M<sup>-</sup>). Anal. calcd. for  $\text{C}_{42}\text{H}_{33}\text{Cl}_3\text{O}_3$ : C, 72.89; H, 4.81. Found: C, 72.97; H, 4.88.

**(±)-3,8,13-tri(4-acetylphenyl)-2,7,12-trimethoxy-10,15-dihydro-5*H*-tribenzo[a,d,g]cycloenoene (5h):**

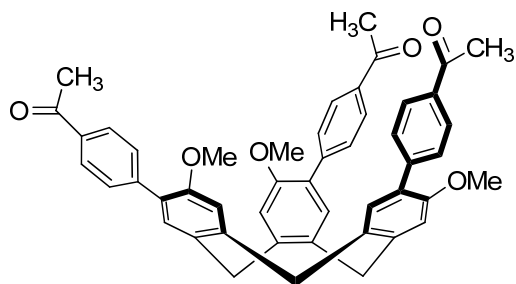

**(±)-5h**

Mp 201-204 °C; yield: 68%; IR (KBr)  $\nu$  2995, 2912, 2840, 1675, 1604, 1573, 1518, 1493, 1461, 1386, 1043, 957  $\text{cm}^{-1}$ ;  $^1\text{H}$  NMR (400 MHz,  $\text{CDCl}_3$ )  $\delta$  7.97 (d,  $J = 8.2$ , 6H, actPh-*H*), 7.55 (d,  $J = 8.2$ , 6H, actPh-*H*), 7.37 (s, 3H, Ar<sub>CTV</sub>-*H*), 6.98 (s, 3H, Ar<sub>CTV</sub>-*H*), 4.93 (d,  $J = 13.6$ , 3H,  $\text{CH}_2$ ), 3.81 (d,  $J = 13.6$ , 3H,  $\text{CH}_2$ ), 3.75 (s, 9H,  $\text{OCH}_3$ ), 2.62 (s, 9H,  $\text{COCH}_3$ );  $^{13}\text{C}$  NMR (100 MHz,  $\text{CDCl}_3$ )  $\delta$  197.8 (CO), 155.5, 143.3, 141.1, 135.6, 132.4, 131.6, 129.6, 128.5, 128.2, 112.9 (ArC), 55.9 ( $\text{OCH}_3$ ), 36.7 ( $\text{CH}_2$ ), 26.6 ( $\text{COCH}_3$ ); MS (positive APCI):  $m/z$  715.54 ( $[\text{M}+\text{H}]^+$ ). Anal. calcd. for  $\text{C}_{48}\text{H}_{42}\text{O}_6$ : C, 80.65; H, 5.92. Found: C, 80.19; H, 6.19.

**(±)-3,8,13-tri(4-(ethoxycarbonyl)phenyl)-2,7,12-trimethoxy-10,15-dihydro-5*H*-tribenzo[*a,d,g*]cyclonoene (5i):**

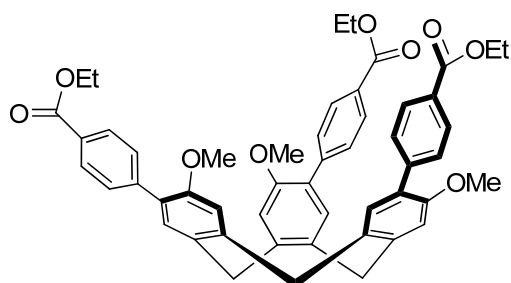

**(±)-5i**

Mp 241-242 °C; yield: 42%; IR (KBr)  $\nu$  2931, 1713, 1609, 1494, 1464, 1387, 1278, 1103, 859  $\text{cm}^{-1}$ ;  $^1\text{H}$  NMR (400 MHz,  $\text{CDCl}_3$ )  $\delta$  8.06 (d,  $J = 8.3$ , 6H, ECPH-*H*), 7.53 (d,  $J = 8.3$ , 6H, ECPH-*H*), 7.37 (s, 3H, Ar<sub>CTV</sub>-*H*), 6.98 (s, 3H, Ar<sub>CTV</sub>-*H*), 4.92 (d,  $J = 13.6$ , 3H, CTV- $\text{CH}_2$ ), 4.39 (q,  $J = 7.1$ , 6H,  $\text{CH}_2\text{CH}_3$ ), 3.80 (d,  $J = 13.7$ , 3H, CTV- $\text{CH}_2$ ), 3.75 (s, 9H,  $\text{OCH}_3$ ), 1.40 (t,  $J = 7.1$ , 9H,  $\text{CH}_2\text{CH}_3$ );  $^{13}\text{C}$  NMR (100 MHz,  $\text{CDCl}_3$ )  $\delta$  166.7 ( $\text{CO}_2$ ), 155.6, 143.1, 141.1, 132.5, 131.6, 129.5, 129.4, 129.4, 129.0, 128.9 (ArC), 61.0 ( $\text{CH}_2\text{CH}_3$ ), 56.0 ( $\text{OCH}_3$ ), 36.8 (CTV- $\text{CH}_2$ ), 14.5 ( $\text{CH}_2\text{CH}_3$ ); MS (positive APCI) :  $m/z$  805.53 ( $[\text{M}+\text{H}]^+$ ). Anal. calcd. for  $\text{C}_{51}\text{H}_{48}\text{O}_9$ : C, 76.10; H, 6.01. Found: C, 75.64; H, 6.04.

**(±)-3,8,13-tri(biphenyl-4-yl)-2,7,12-trimethoxy-10,15-dihydro-5*H*-tribenzo[*a,d,g*]cyclonoene (5j):**

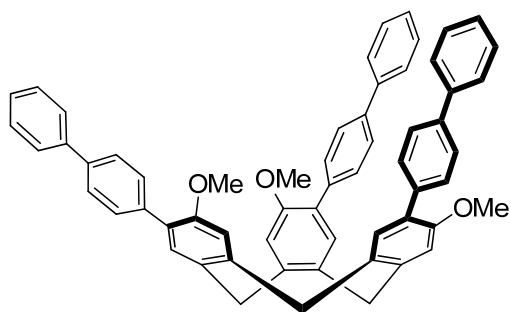

(±)-5j

Mp 193-195 °C; yield: 45%; IR (KBr)  $\nu$  3025, 2837, 1609, 1498, 1483, 1463, 1045, 840  $\text{cm}^{-1}$ ;  $^1\text{H}$  NMR (400 MHz,  $\text{CDCl}_3$ )  $\delta$  7.63-7.58 (m, 12H, Biph-*H*), 7.55 (d,  $J = 8.2$ , 6H, Biph-*H*), 7.49-7.40 (m, 6H, Biph-*H*), 7.43 (s, 3H, Ar<sub>CTV</sub>-*H*), 7.34 (t,  $J = 7.3$ , 3H, Biph-*H*), 7.03 (s, 3H, Ar<sub>CTV</sub>-*H*), 4.95 (d,  $J = 13.6$ , 3H,  $\text{CH}_2$ ), 3.83 (d,  $J = 13.6$ , 3H,  $\text{CH}_2$ ), 3.80 (s, 9H,  $\text{OCH}_3$ );  $^{13}\text{C}$  NMR (100 MHz,  $\text{CDCl}_3$ )  $\delta$  155.6, 141.1, 140.4, 139.8, 137.5, 132.5, 131.7, 130.0, 129.3, 128.9, 127.3, 127.2, 126.9, 113.1 (ArC), 56.1 ( $\text{OCH}_3$ ), 36.9 ( $\text{CH}_2$ ); MS (positive APCI):  $m/z$  817.34 ( $[\text{M}+\text{H}]^+$ ). Anal. calcd. for  $\text{C}_{60}\text{H}_{48}\text{O}_3$ : C, 88.20; H, 5.92. Found: C, 87.64; H, 5.93.

(±)-2,7,12-trimethoxy-3,8,13-tri(pyridin-4-yl)-10,15-dihydro-5*H*-tribenzo[*a,d,g*]cy  
clonene (5k):

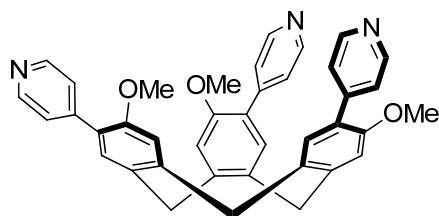

(±)-5k

Mp >320 °C; yield: 23%; IR (KBr)  $\nu$  2962, 1595, 1508, 1486, 1456, 1390, 1240, 1040, 993, 830  $\text{cm}^{-1}$ ;  $^1\text{H}$  NMR (400 MHz,  $\text{CDCl}_3$ )  $\delta$  8.61 (d,  $J = 5.2$ , 6H, Py-*H*), 7.39 (d,  $J = 5.2$ , 6H, Py-*H*), 7.36 (s, 3H, Ar<sub>CTV</sub>-*H*), 6.98 (s, 3H, Ar<sub>CTV</sub>-*H*), 4.92 (d,  $J = 13.6$ , 3H,  $\text{CH}_2$ ), 3.81 (d,  $J = 13.8$ , 3H,  $\text{CH}_2$ ), 3.78 (s, 9H,  $\text{OCH}_3$ );  $^{13}\text{C}$  NMR (100 MHz,  $\text{CDCl}_3$ )  $\delta$  155.7, 149.7, 146.1, 141.8, 132.2, 131.6, 127.0, 124.3, 113.0 (ArC), 56.0 ( $\text{OCH}_3$ ), 36.8 ( $\text{CH}_2$ ); MS (positive APCI):  $m/z$  592.49 ( $[\text{M}+\text{H}]^+$ ). Anal. calcd. for  $\text{C}_{39}\text{H}_{33}\text{N}_3\text{O}_3$ : C, 79.16; H, 5.62; N, 7.10. Found: C, 79.33; H, 5.76; N, 7.12.

**(±)-2,7,12-trimethoxy-3,8,13-tri(thiophen-2-yl)-10,15-dihydro-5H-tribenzo[a,d,g] cyclonoene (5l):**

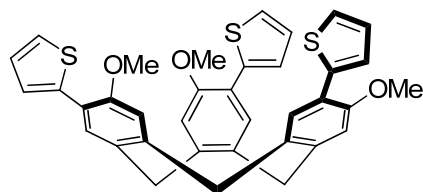

**(±)-5l**

Mp: 160 °C (decomp.); yield: 21%; IR (KBr)  $\nu$  3100, 2956, 2931, 1604, 1567, 1492, 1463, 1392, 1267, 1209, 1020, 847  $\text{cm}^{-1}$ ;  $^1\text{H}$  NMR (400 MHz,  $\text{CDCl}_3$ )  $\delta$  7.60 (s, 3H,  $\text{Ar}_{\text{CTV}}\text{-H}$ ), 7.40 (d,  $J = 3.2$ , 3H, Tp-H), 7.25 (d,  $J = 5.2$ , 3H, Tp-H), 7.04 (dd,  $J = 5.2$ , 3.2, 3H, Tp-H), 6.99 (s, 3H,  $\text{Ar}_{\text{CTV}}\text{-H}$ ), 4.82 (d,  $J = 13.6$ , 3H,  $\text{CH}_2$ ), 3.88 (s, 9H,  $\text{OCH}_3$ ), 3.73 (d,  $J = 13.6$ , 3H,  $\text{CH}_2$ );  $^{13}\text{C}$  NMR (100 MHz,  $\text{CDCl}_3$ )  $\delta$  154.8, 140.1, 139.7, 131.5, 130.5, 127.2, 125.5, 124.9, 122.4, 113.2 (ArC), 56.0 ( $\text{OCH}_3$ ), 36.7 ( $\text{CH}_2$ ); MS (positive APCI) :  $m/z$  607.38 ( $[\text{M}+\text{H}]^+$ ). Anal. calcd. for  $\text{C}_{36}\text{H}_{30}\text{O}_3\text{S}_3 \cdot 0.1\text{CHCl}_3$ : C, 70.07; H, 4.90. Found: C, 70.01; H, 4.95.

**2,7,12-trihydroxy-3,8,13-triphenyl-10,15-dihydro-5H-tribenzo[a,d,g] cyclonoene (+)/(-)-6:**

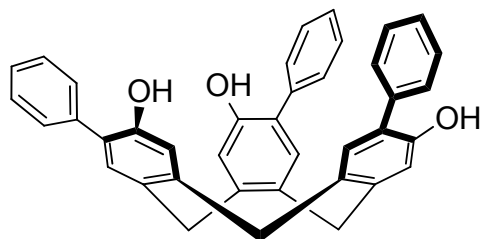

**(±)-6**

Mp  $>220^\circ\text{C}$ , decompose; IR (KBr)  $\nu$  3640~3164(br), 3053, 3029, 2914, 2855, 1621, 1578, 1507, 1484, 1447, 1385, 899, 762, 744, 699  $\text{cm}^{-1}$ ;  $^1\text{H}$  NMR (400 MHz,  $\text{CDCl}_3$ )  $\delta$  7.51 – 7.43 (m, 6H), 7.42 (s, 3H), 7.41 – 7.35 (m, 6H), 7.28 (s, 3H), 6.98 (s, 3H), 5.00 (s, 3H), 4.84 (d,  $J = 13.5$ , 3H), 3.73 (d,  $J = 13.6$ , 3H);  $^{13}\text{C}$  NMR (100 MHz,  $\text{CDCl}_3$ )  $\delta$  151.3, 141.1, 137.0, 132.0, 131.7, 129.5, 129.2, 128.0, 127.2, 117.0, 36.4; MS (APCI) :  $m/z$  545.45  $[\text{M}-\text{H}]^+$ ; Anal. Calcd for  $\text{C}_{39}\text{H}_{30}\text{O}_3$ : C, 85.69; H, 5.53. Found: C, 84.19; H, 5.57 (**6** + 0.5  $\text{H}_2\text{O}$ ).



**2,7,12-tricamphananic ester-3,8,13-triphenyl-10,15-dihydro-5H –tribenzo[a,d,g]cycloenoene diastereoisomers part A and part B:**

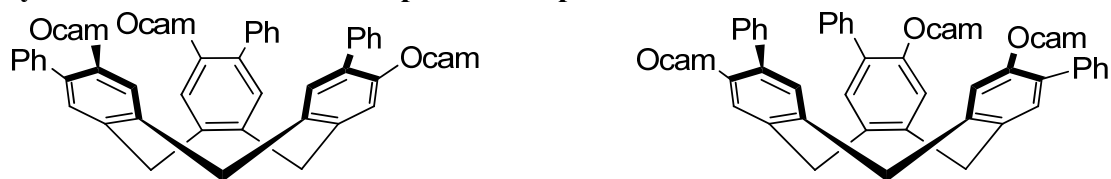

**Part A and B**

**A:** Mp 218-219°C; IR (KBr)  $\nu$  3056, 3028, 2968, 2875, 1793, 1755, 1617, 1508, 1484, 1446, 1260, 1046, 903, 839, 764, 701;  $^1\text{H}$  NMR (400 MHz,  $\text{CDCl}_3$ )  $\delta$  7.40 (s, 3H), 7.40 – 7.27 (m, 15H), 7.16 (s, 3H), 4.94 (d,  $J = 13.6$ , 3H), 3.87 (d,  $J = 13.7$ , 3H), 2.23 – 2.10 (m, 3H), 1.96 – 1.76 (m, 6H), 1.62 (ddd,  $J = 13.3, 9.3, 4.2$ , 3H), 1.05 (s, 9H), 0.85 (s, 9H), 0.66 (s, 9H);  $^{13}\text{C}$  NMR (100 MHz,  $\text{CDCl}_3$ )  $\delta$  178.0, 166.1, 146.1, 140.0, 137.5, 137.0, 134.2, 132.9, 129.3, 128.4, 127.8, 123.8, 90.8, 54.9, 54.4, 36.5, 31.0, 29.0, 16.7, 16.3, 9.7; **B:** Mp 225°C; IR (KBr)  $\nu$  3056, 3028, 2967, 2929, 2874, 1793, 1755, 1617, 1508, 1484, 1446, 1259, 1167, 1046, 903, 838, 764, 702 $\text{cm}^{-1}$ ;  $^1\text{H}$  NMR (400 MHz,  $\text{CDCl}_3$ )  $\delta$  7.41 (s, 3H), 7.40 – 7.28 (m, 15H), 7.14 (s, 3H), 4.94 (d,  $J = 13.6$ , 3H), 3.87 (d,  $J = 13.7$ , 3H), 2.11 (ddd,  $J = 28.9, 16.6, 10.0$ , 3H), 1.90 – 1.74 (m, 6H), 1.68 – 1.56 (m, 3H), 1.04 (s, 9H), 0.82 (s, 9H), 0.72 (s, 9H);  $^{13}\text{C}$  NMR (100 MHz,  $\text{CDCl}_3$ )  $\delta$  178.0, 166.0, 146.2, 139.9, 137.4, 137.0, 134.3, 132.9, 129.5, 128.5, 127.8, 123.8, 90.8, 54.9, 54.3, 36.6, 31.0, 29.0, 16.5, 16.4, 9.7; MS (APCI) :  $m/z$  1046.81  $[\text{M}+\text{H}]^+$ ; Anal. Calcd for  $\text{C}_{66}\text{H}_{60}\text{O}_{12}$ : C, 75.84; H, 5.79. Found: C, 75.29; H, 6.03 (A/B + 0.5  $\text{H}_2\text{O}$ ).

## 2. NMR spectra of compound 5a-5l, 6 and diastereoisomers

### <sup>1</sup>H and <sup>13</sup>C NMR of (±)-5a

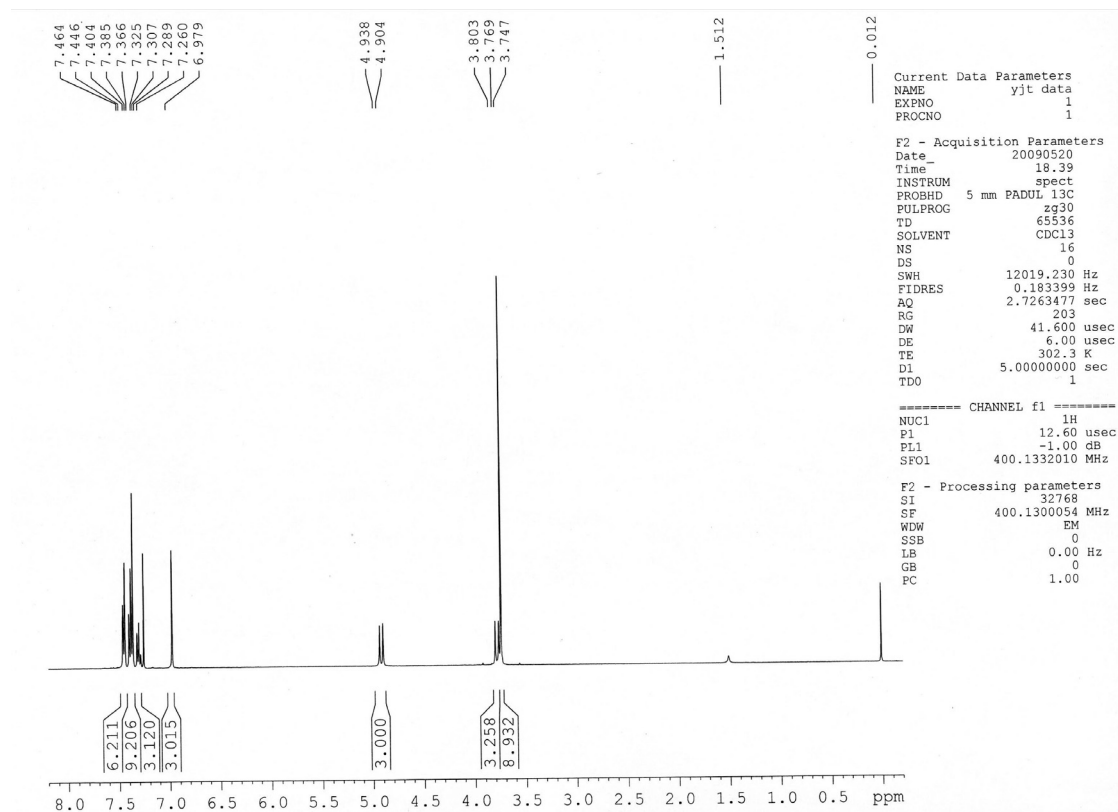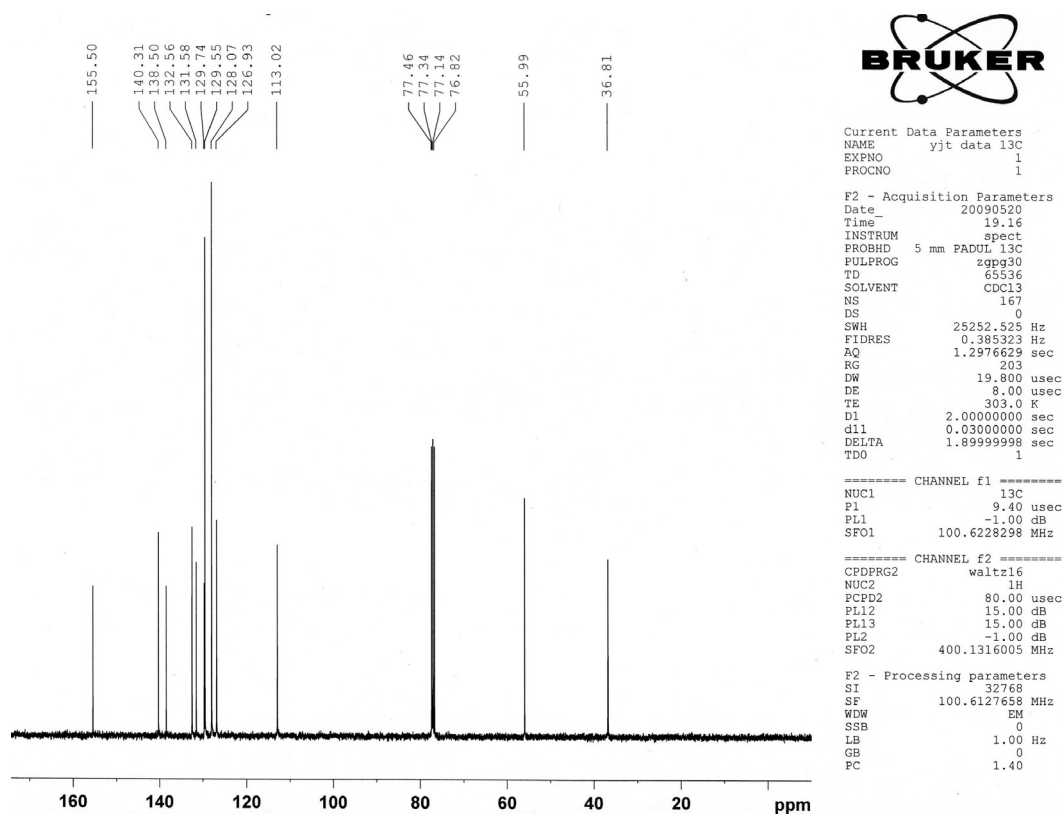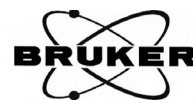

### $^1\text{H}$ and $^{13}\text{C}$ NMR of ( $\pm$ )-5b

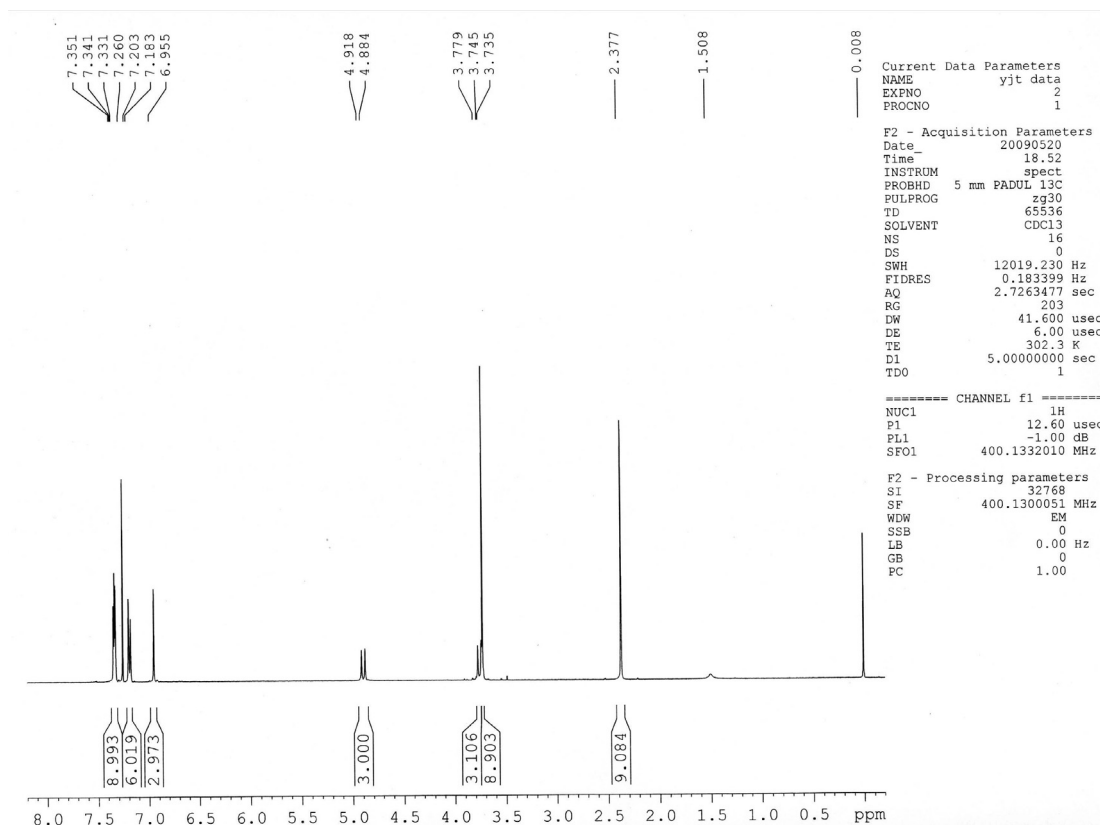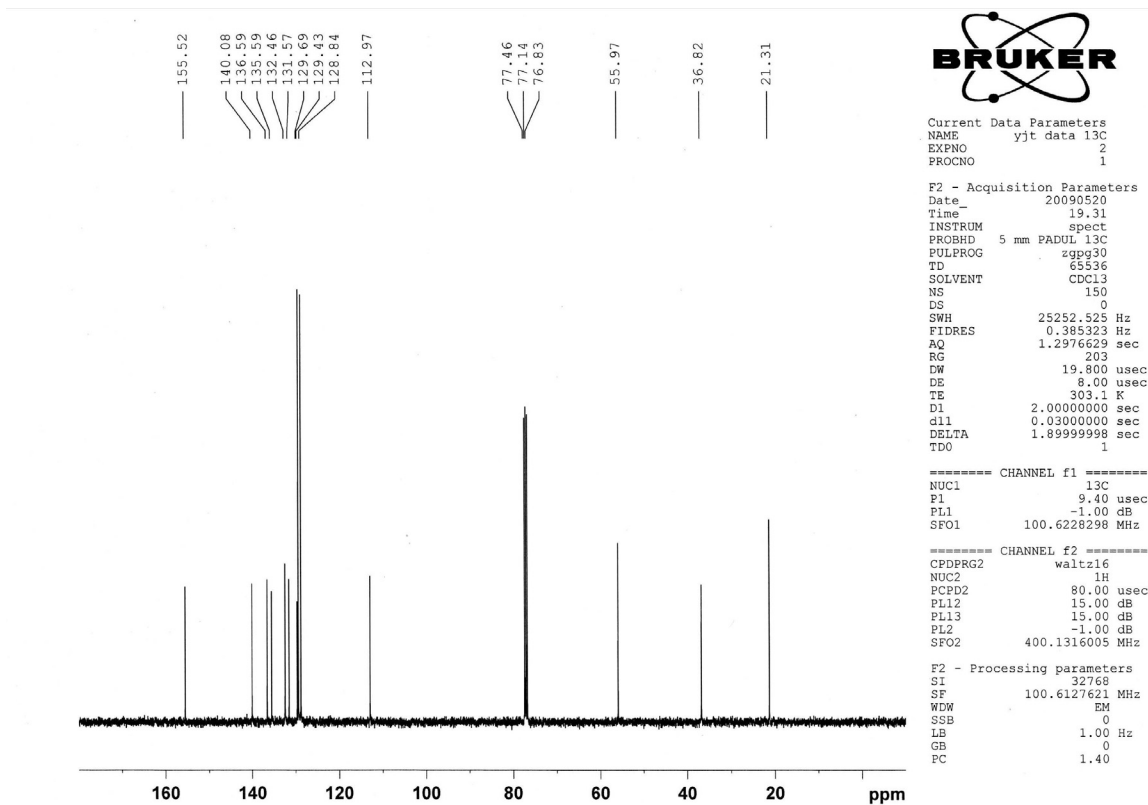

<sup>1</sup>H and <sup>13</sup>C NMR of (±)-5c

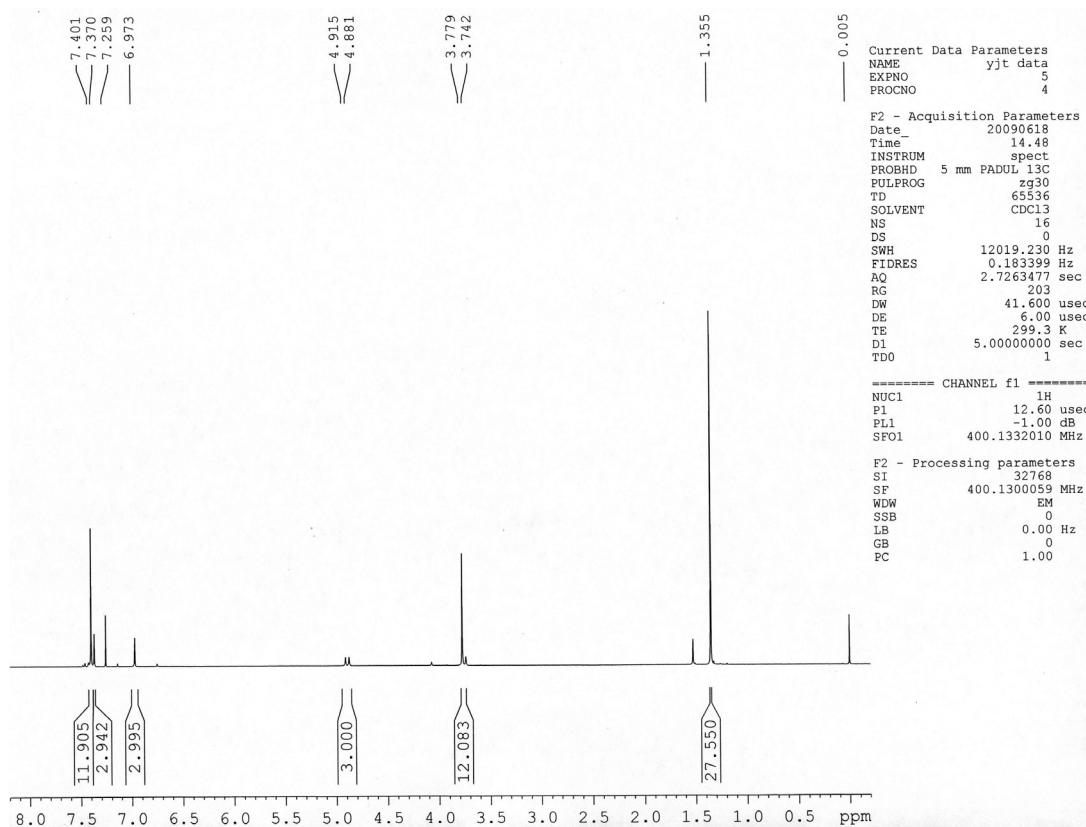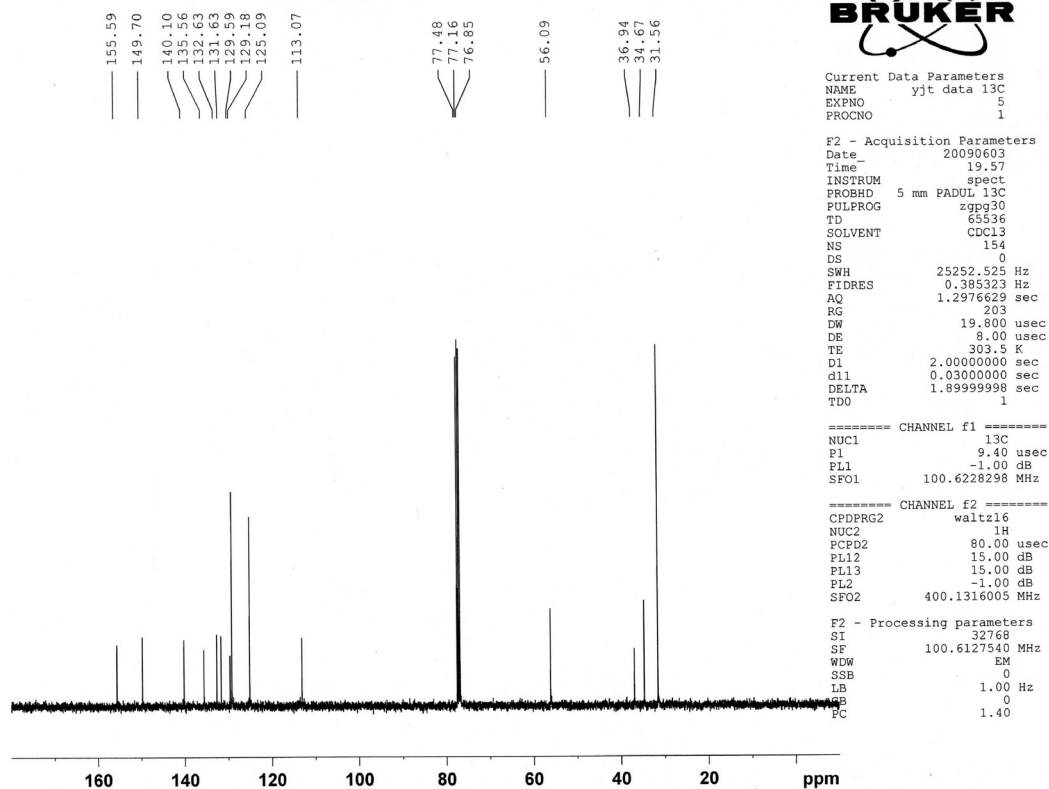

### <sup>1</sup>H and <sup>13</sup>C NMR of (±)-5d

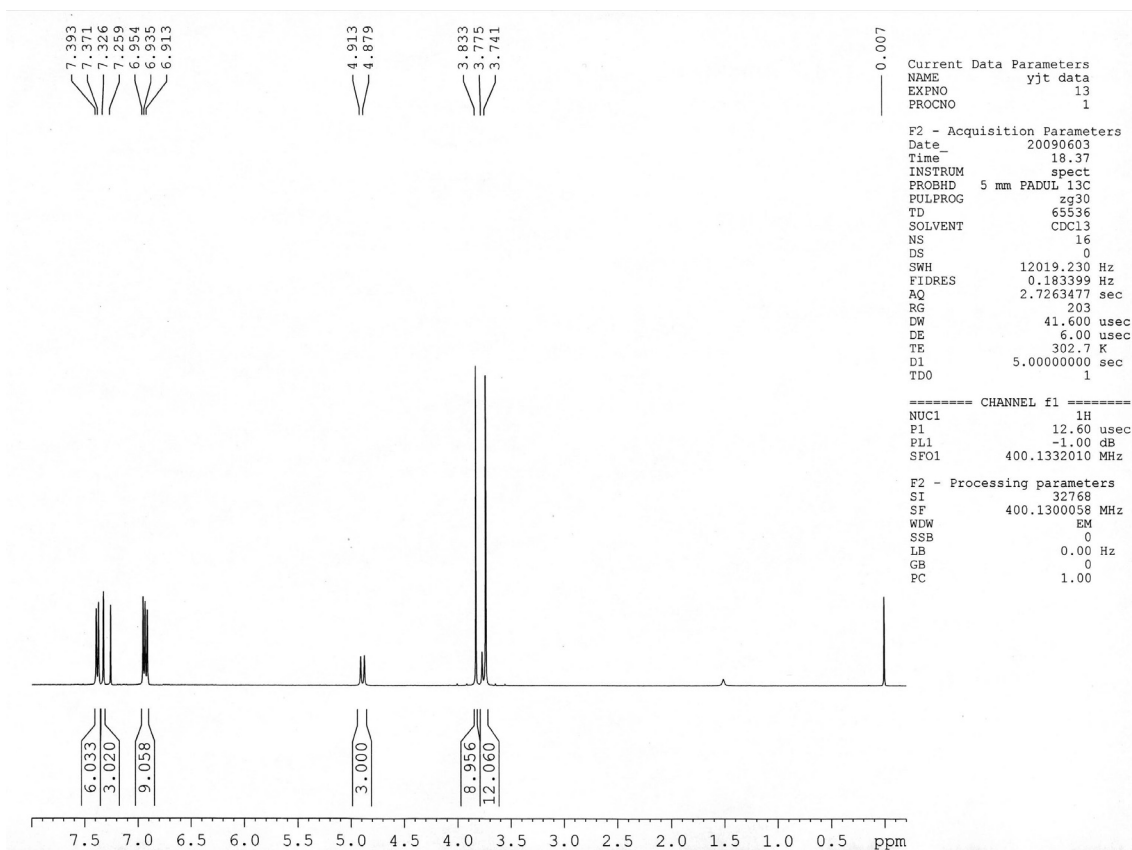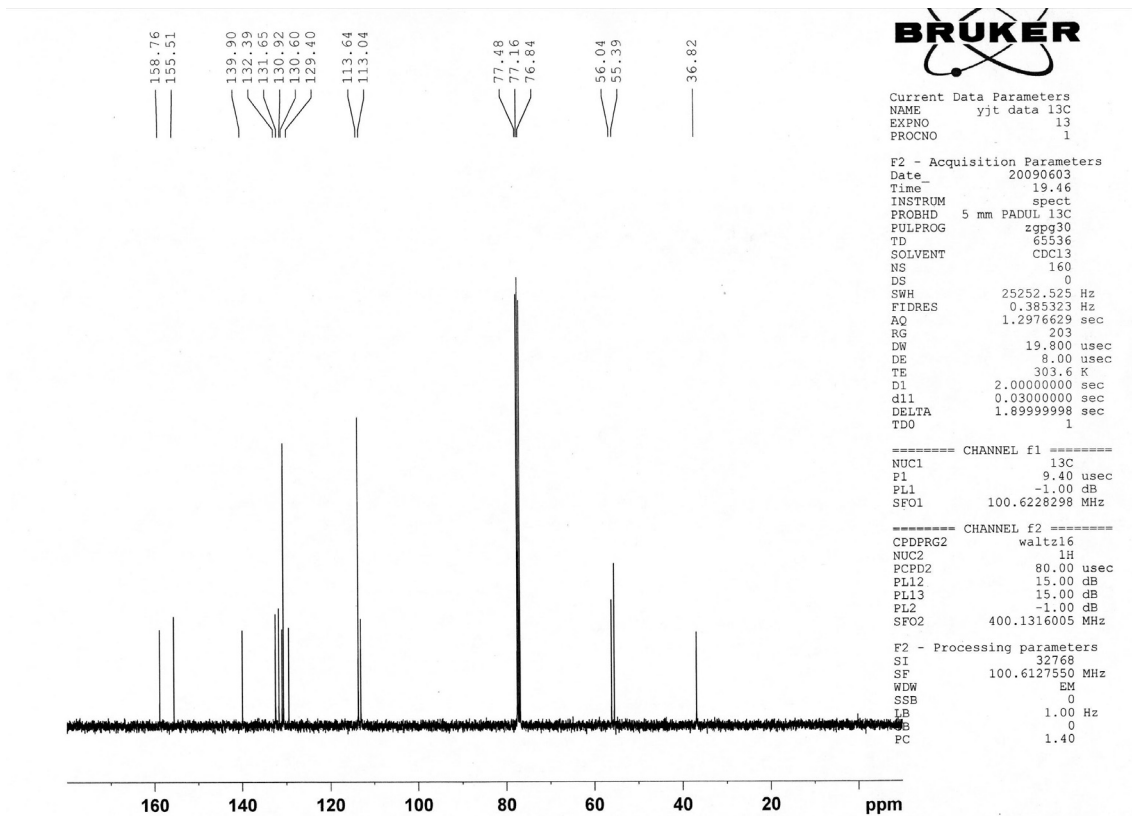

$^1\text{H}$  and  $^{13}\text{C}$  NMR of ( $\pm$ )-5e

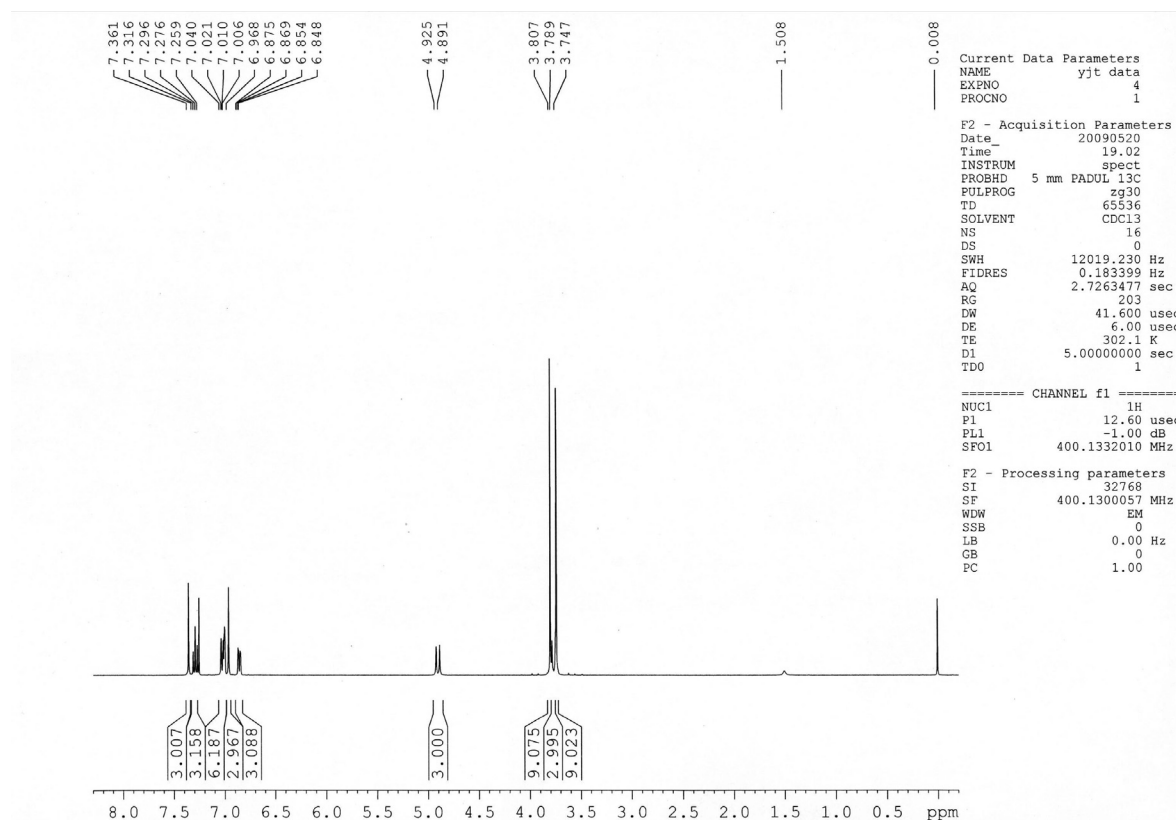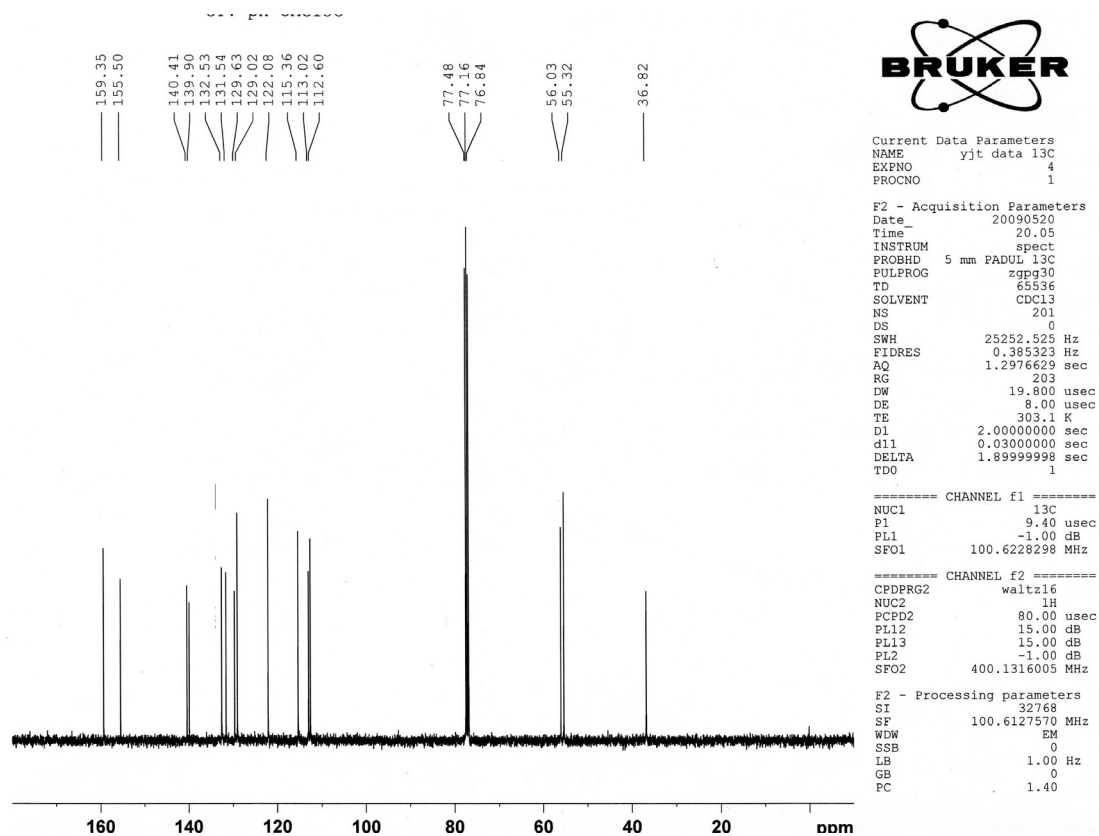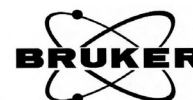

### <sup>1</sup>H and <sup>13</sup>C NMR of (±)-5f

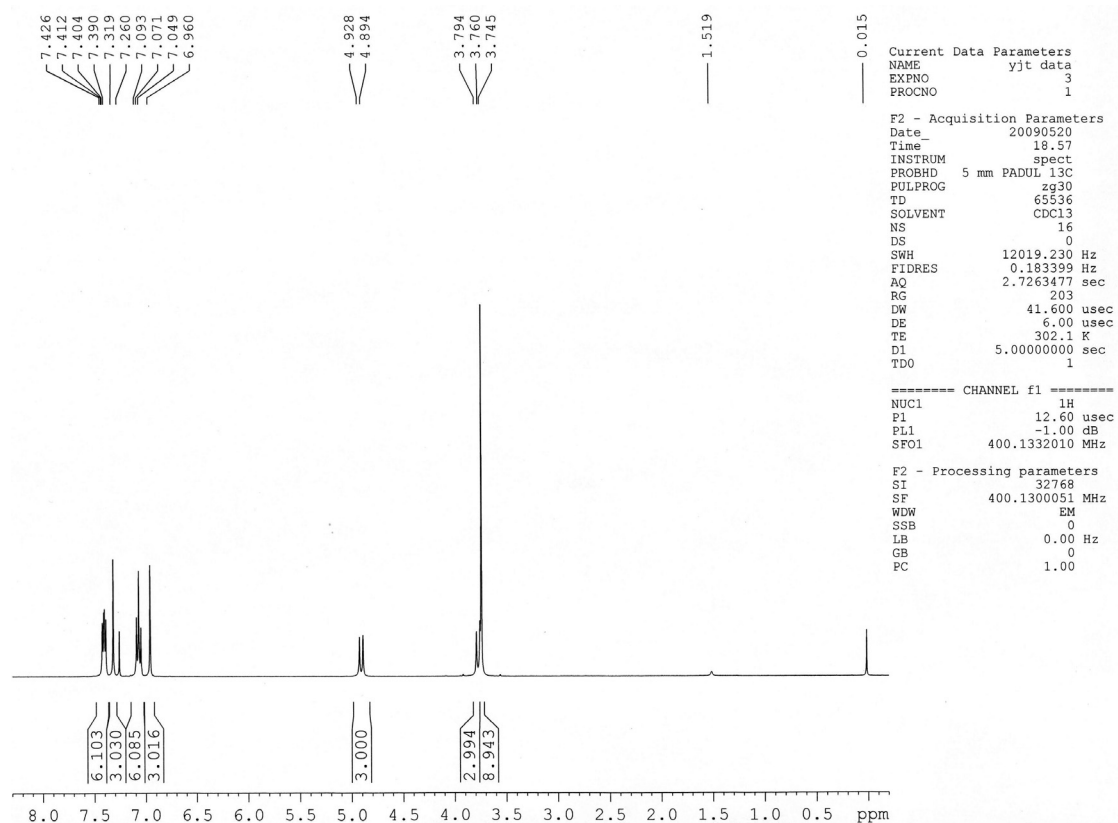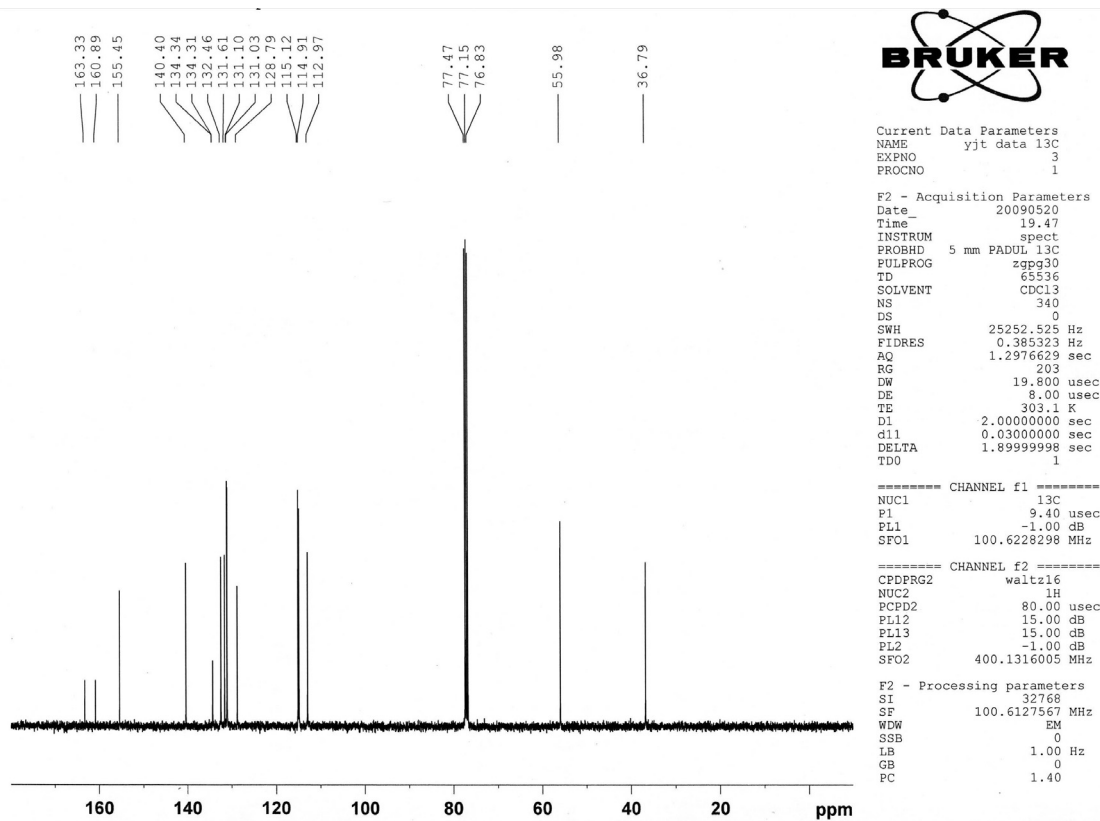

### $^1\text{H}$ and $^{13}\text{C}$ NMR of ( $\pm$ )-5g

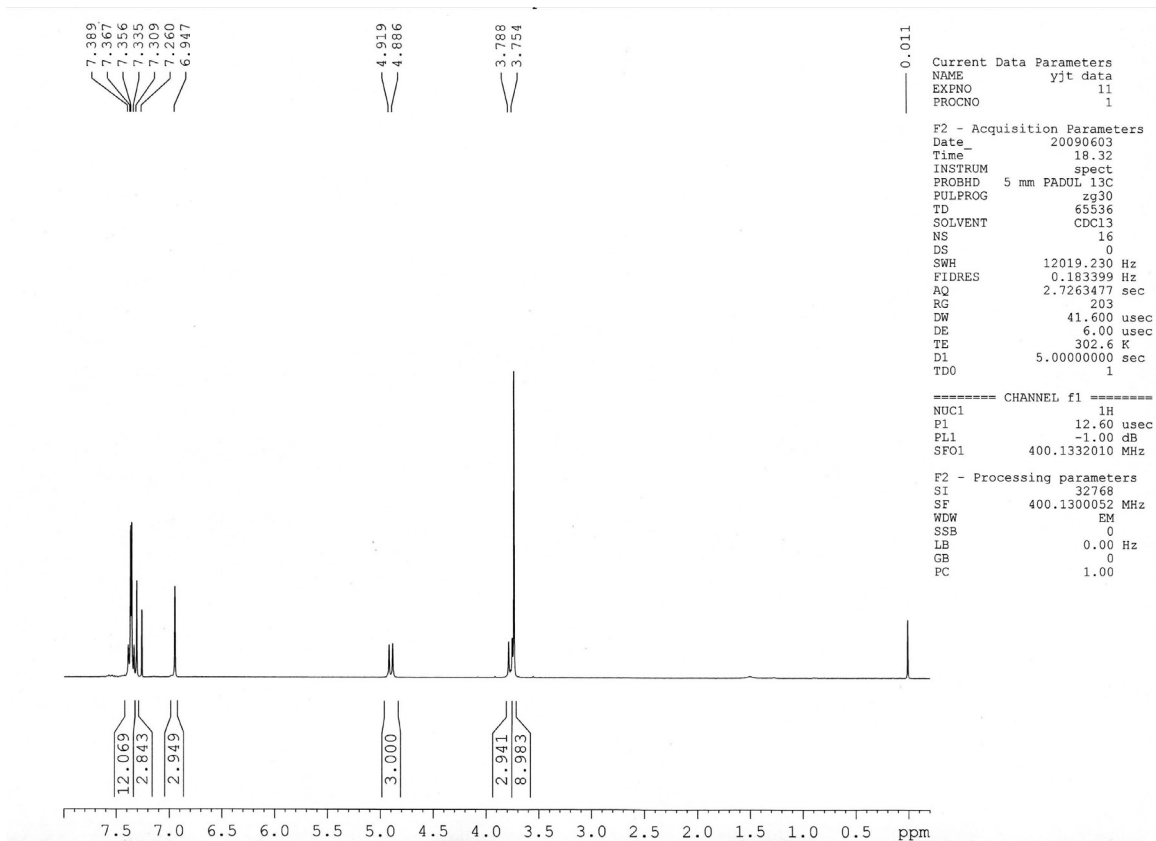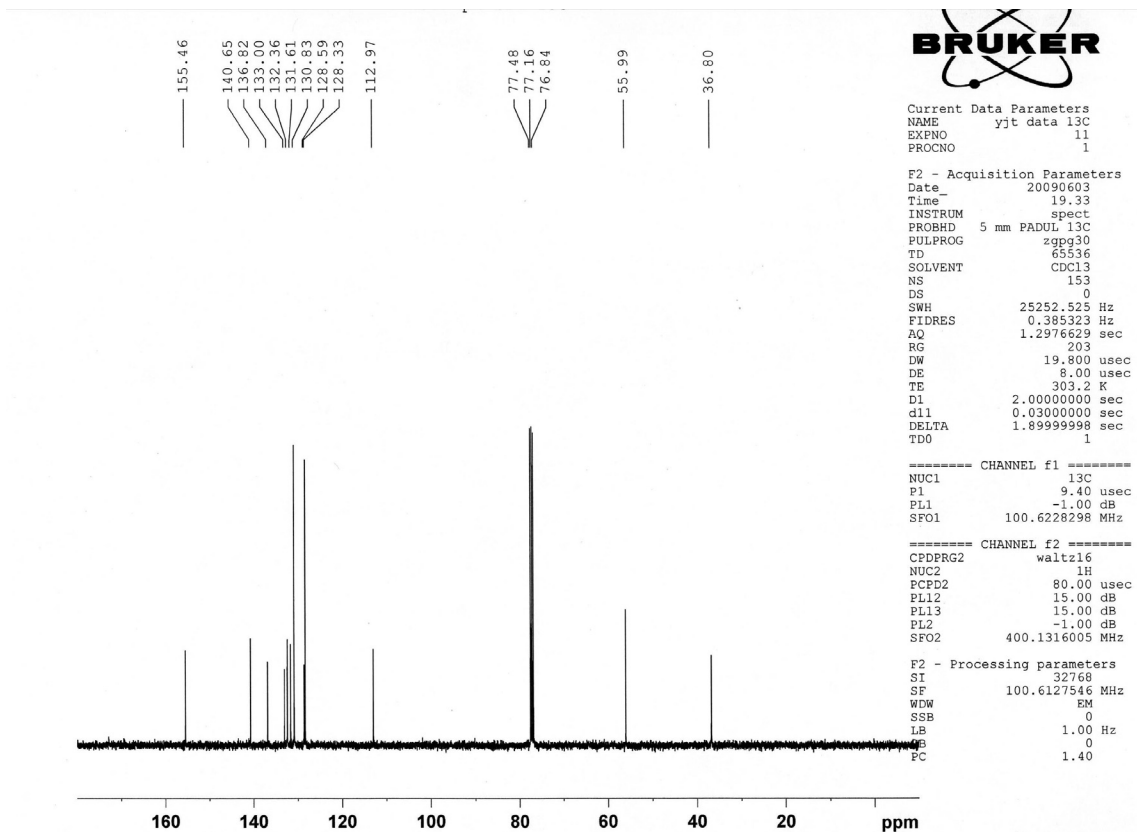



### <sup>1</sup>H and <sup>13</sup>C NMR of (±)-5h

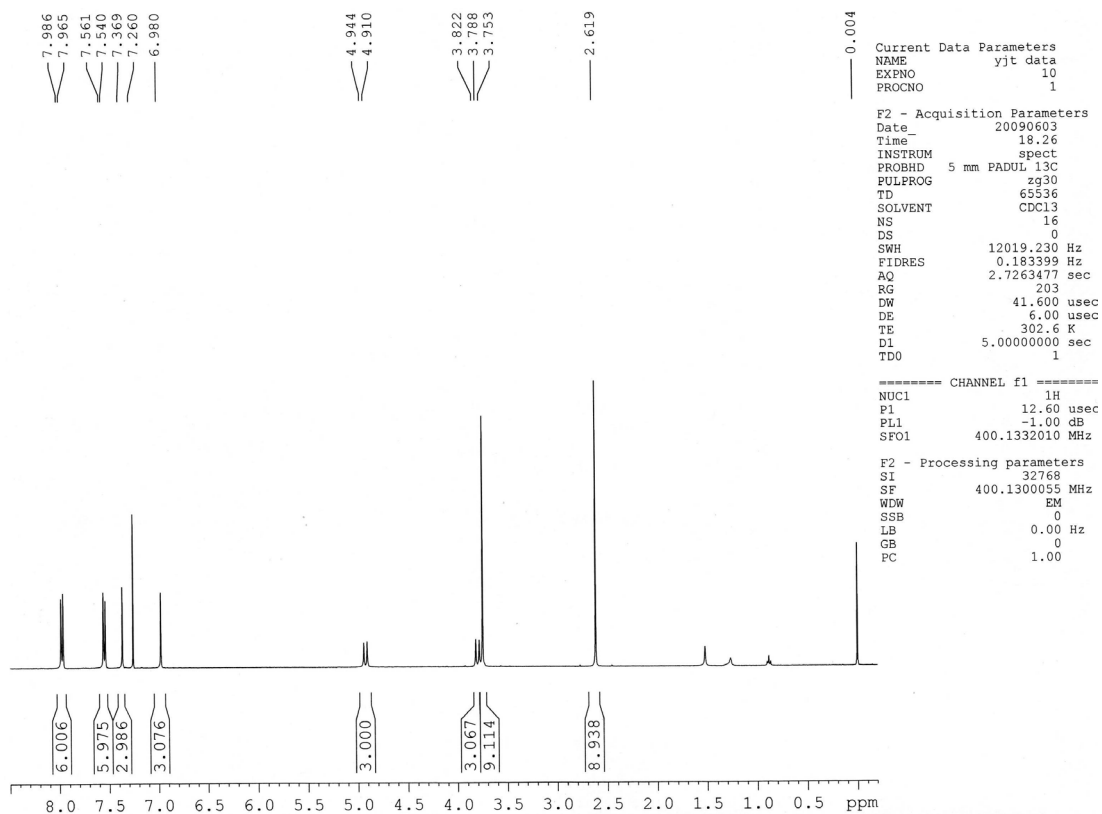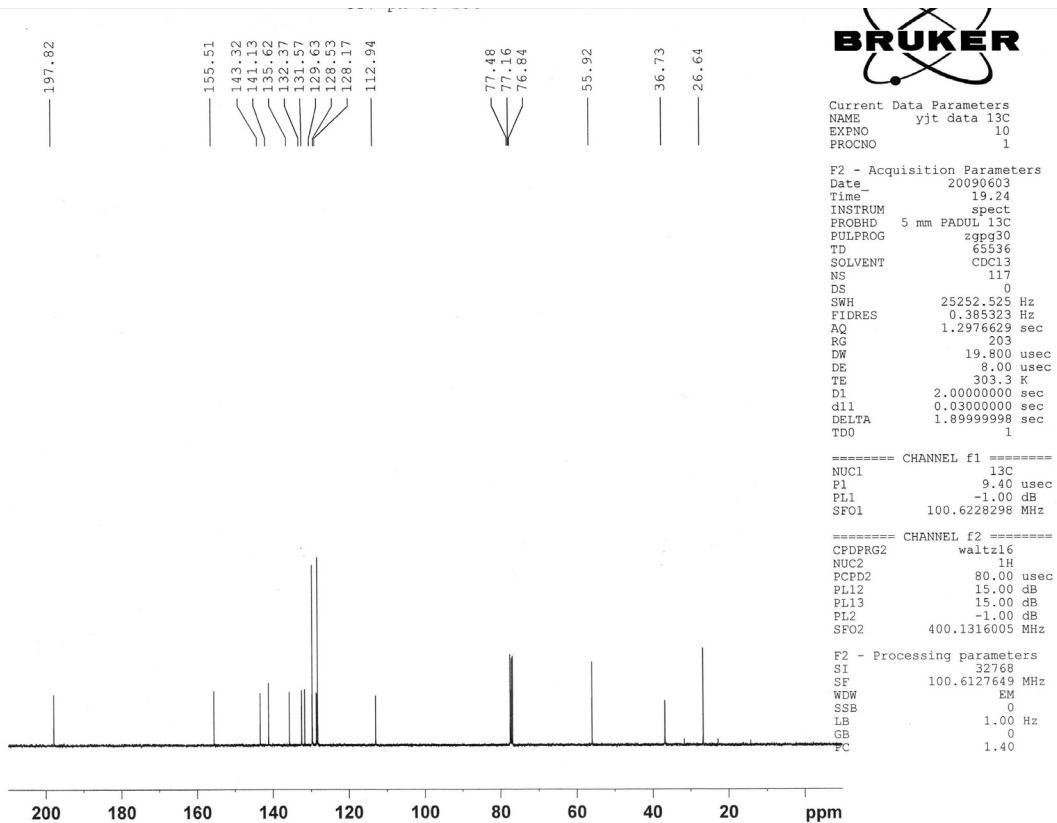

### $^1\text{H}$ and $^{13}\text{C}$ NMR of ( $\pm$ )-5i

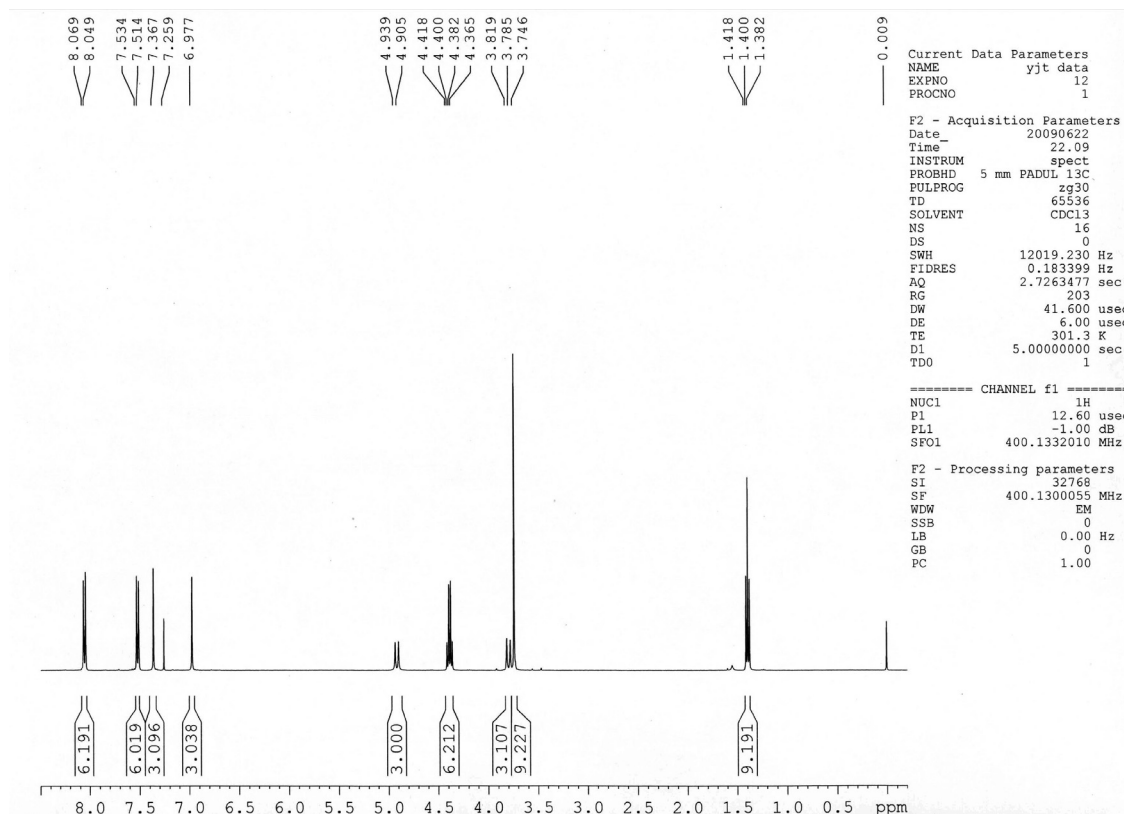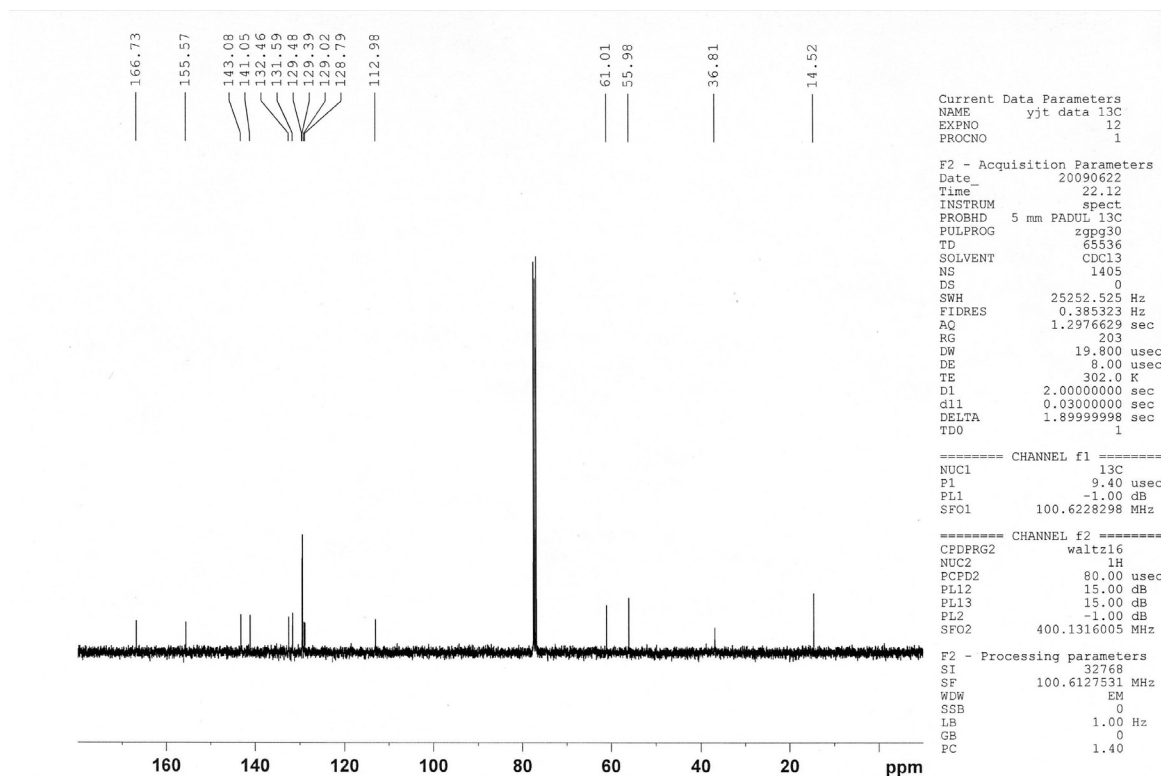

### <sup>1</sup>H and <sup>13</sup>C NMR of (±)-5j

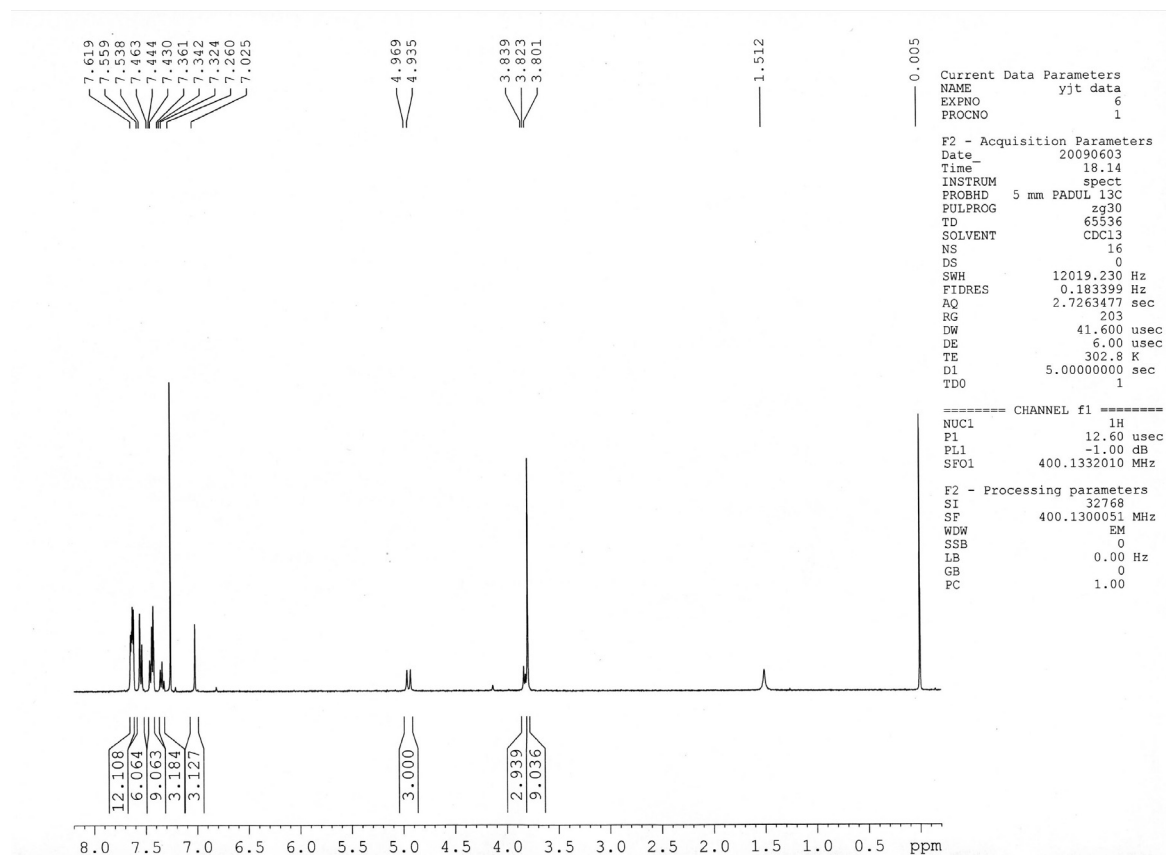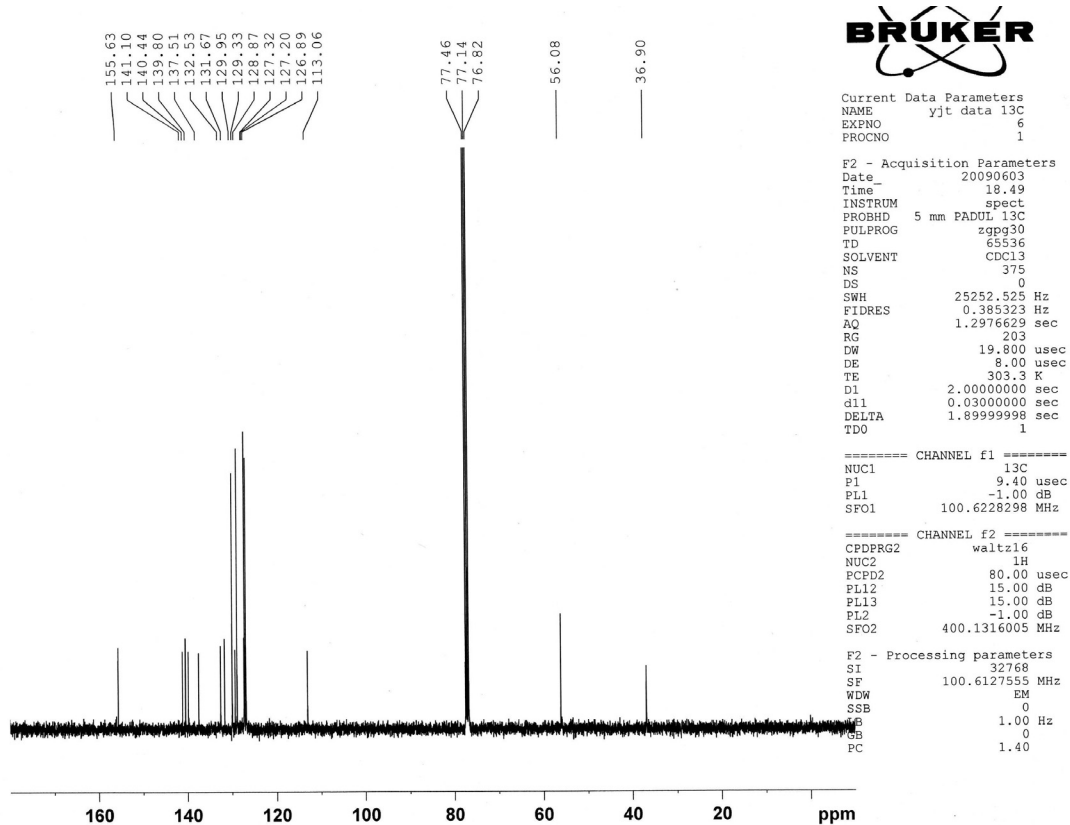

### <sup>1</sup>H and <sup>13</sup>C NMR of (±)-5k

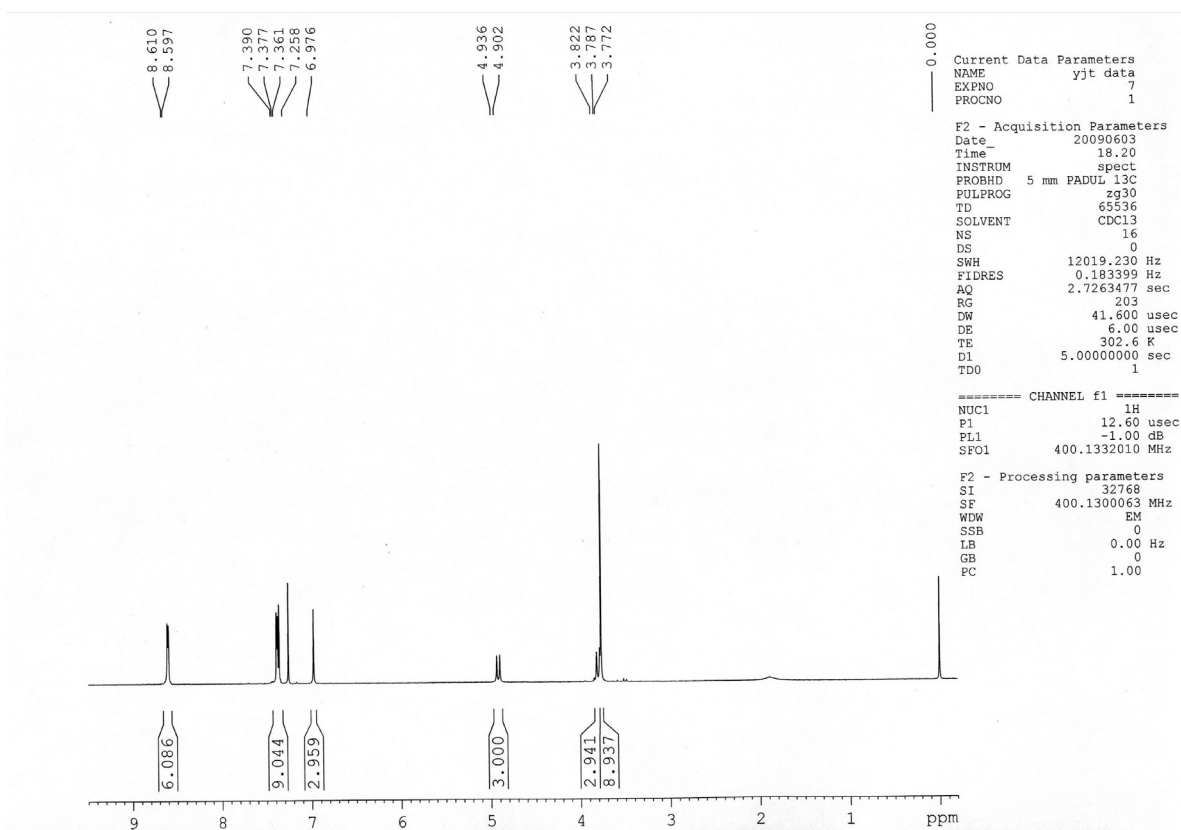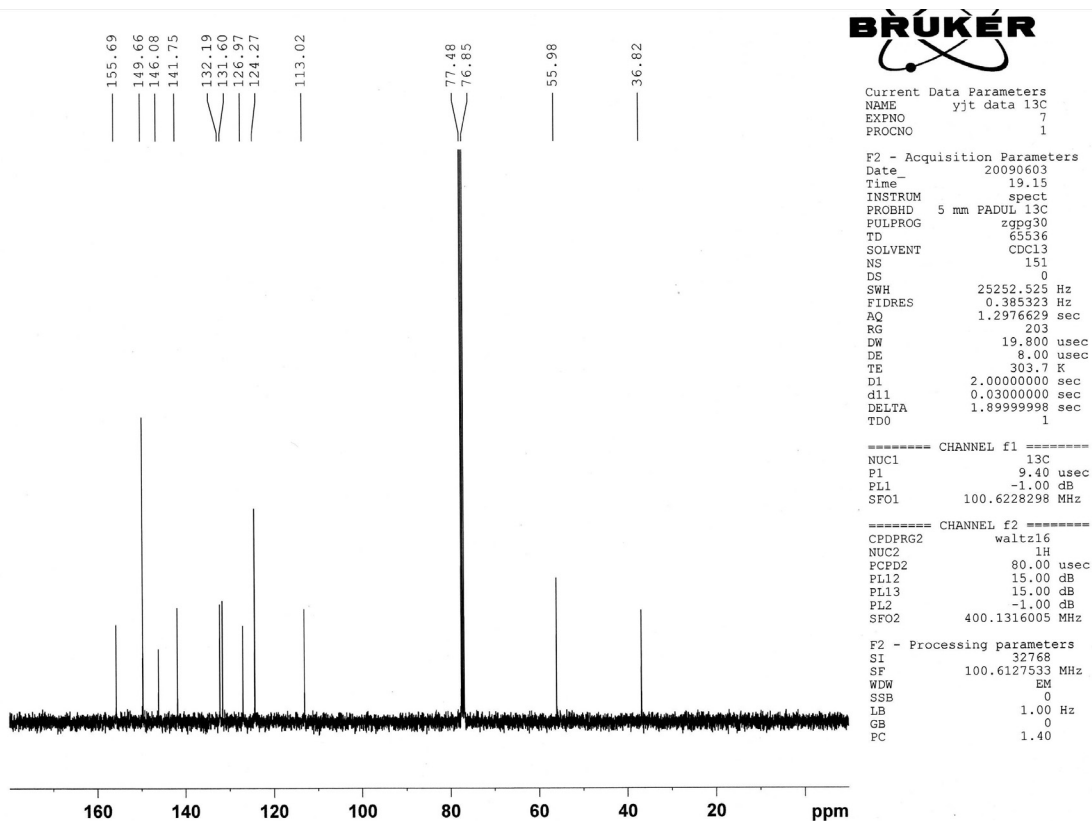

### <sup>1</sup>H and <sup>13</sup>C NMR of (±)-5I

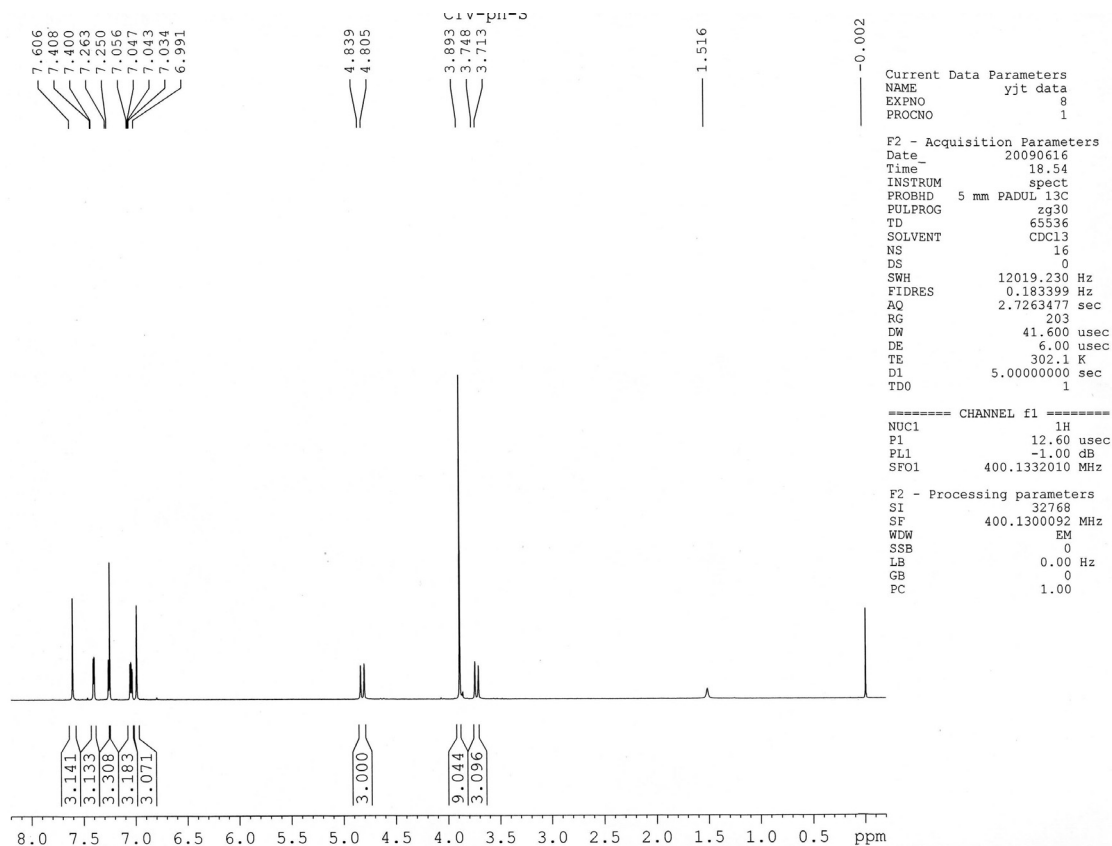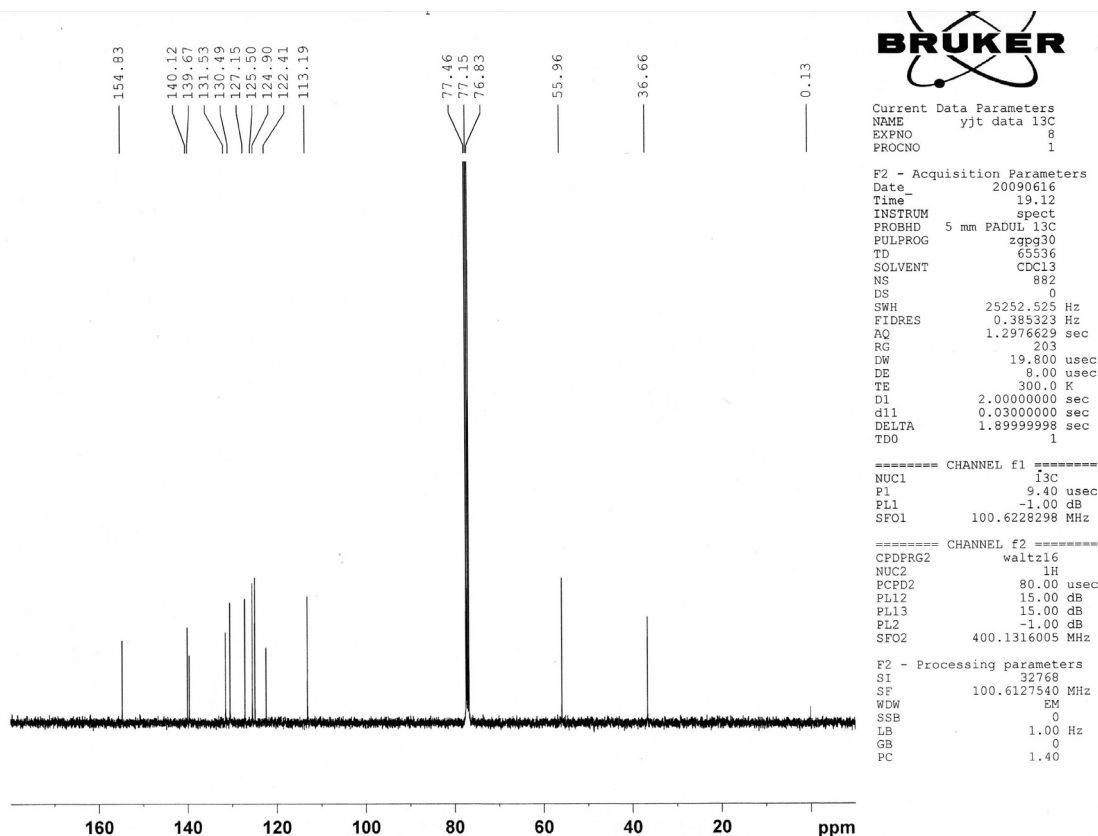

### $^1\text{H}$ and $^{13}\text{C}$ NMR of ( $\pm$ )-6

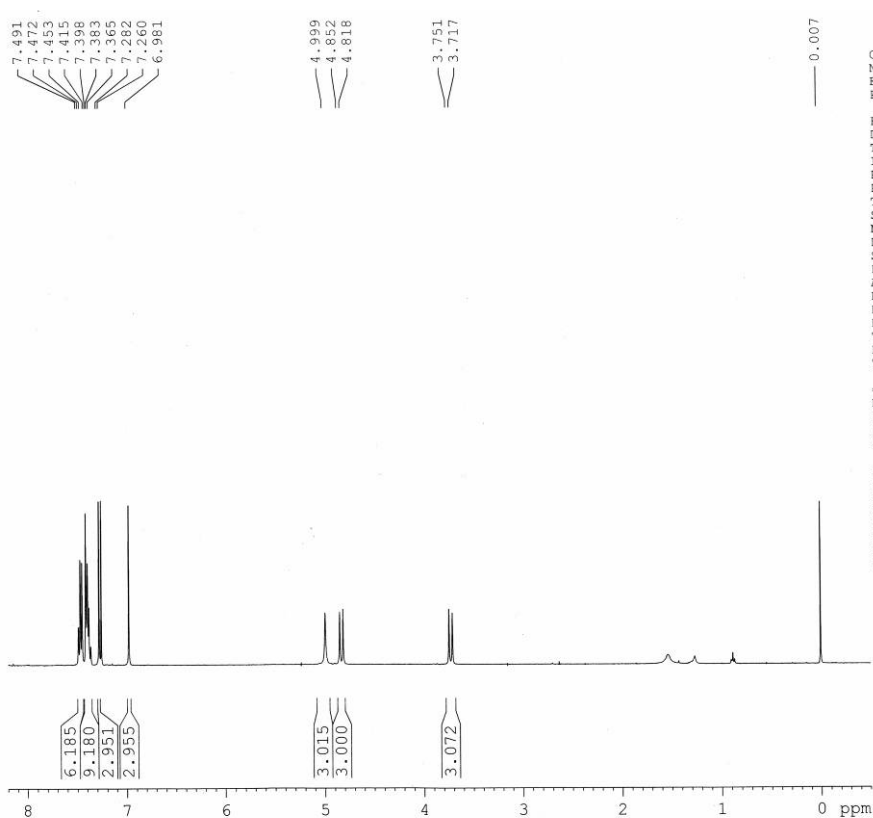

```
Current Data Parameters
NAME      yjt data
EXPNO    17
PROCNO   1

F2 - Acquisition Parameters
Date      20090719
Time      9.20
INSTRUM  spect
PROBHD    5 mm PADUL 13C
PULPROG   zg30
TD         65536
SOLVENT   CDCl3
NS         16
DS         0
SWH        12019.230 Hz
FIDRES     0.183399 Hz
AQ         2.7263477 sec
RG         203
DW         41.600 usec
DE         6.00 usec
TE         301.6 K
D1         5.00000000 sec
TD0        1

===== CHANNEL f1 =====
NUC1      1H
P1         12.60 usec
PL1        -1.00 dB
SFO1      400.1332010 MHz

F2 - Processing parameters
SI         32768
SF         400.1300053 MHz
WDW        EM
SSB        0
LB         0.00 Hz
GB         0
PC         1.00
```

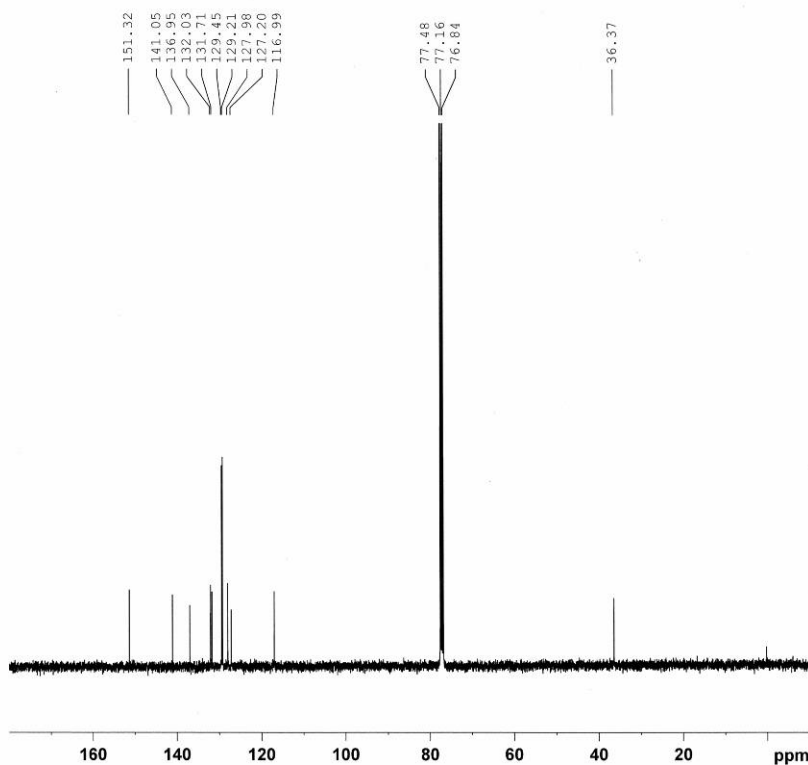

```
Current Data Parameters
NAME      yjt data 13C
EXPNO    15
PROCNO   1

F2 - Acquisition Parameters
Date      20090719
Time      9.21
INSTRUM  spect
PROBHD    5 mm PADUL 13C
PULPROG   zgpg30
TD         65536
SOLVENT   CDCl3
NS         2769
DS         0
SWH        25252.525 Hz
FIDRES     0.385323 Hz
AQ         1.2976629 sec
RG         203
DW         19.800 usec
DE         8.00 usec
TE         301.9 K
D1         2.00000000 sec
d11        0.03000000 sec
DELTA     1.89999998 sec
TD0        1

===== CHANNEL f1 =====
NUC1      13C
P1         9.40 usec
PL1        -1.00 dB
SFO1      100.6228298 MHz

===== CHANNEL f2 =====
CPDPRG2   waltz16
NUC2      1H
PCPDZ     80.00 usec
PL12      15.00 dB
PL13      15.00 dB
PL2       -1.00 dB
SFO2      400.1316005 MHz

F2 - Processing parameters
SI         32768
SF         100.6127522 MHz
WDW        EM
SSB        0
LB         1.00 Hz
GB         0
PC         1.40
```

### <sup>1</sup>H NMR spectra of part A and part B

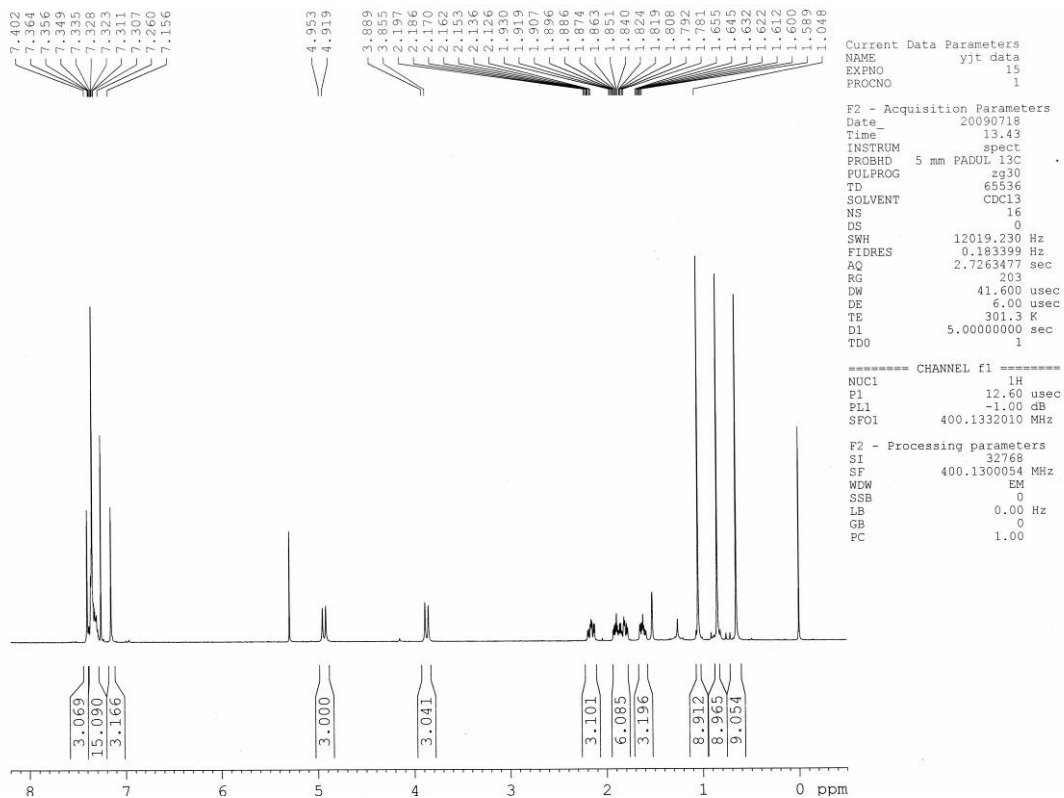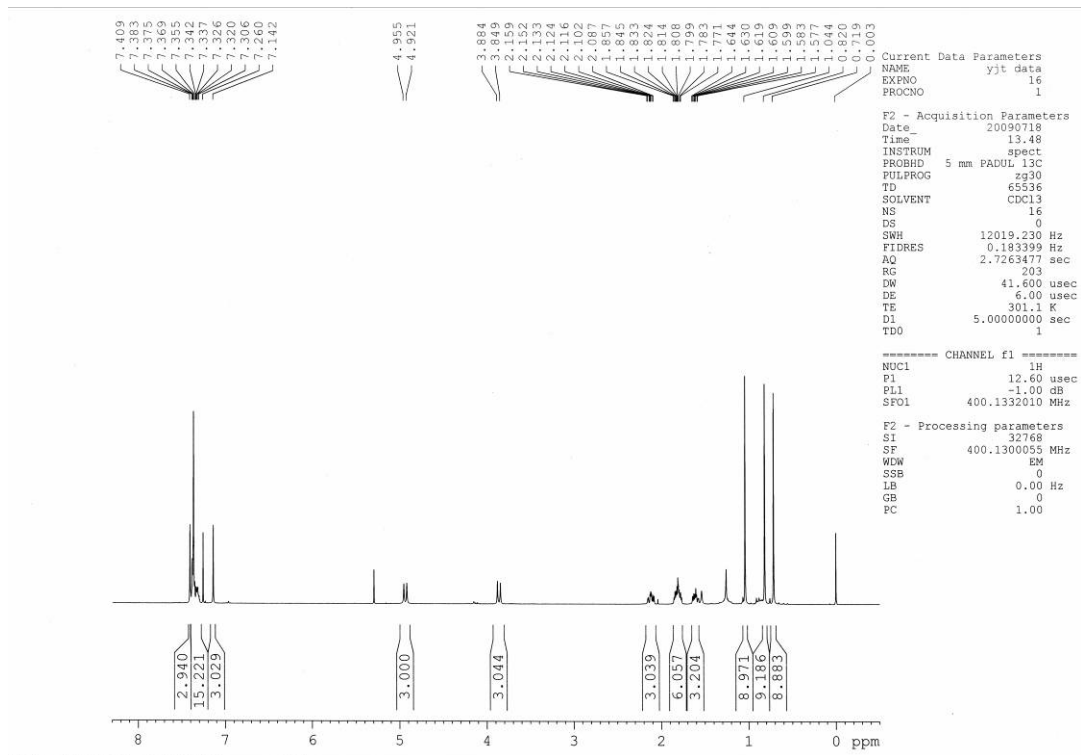

### <sup>13</sup>C NMR spectrum of the diastereoisomers

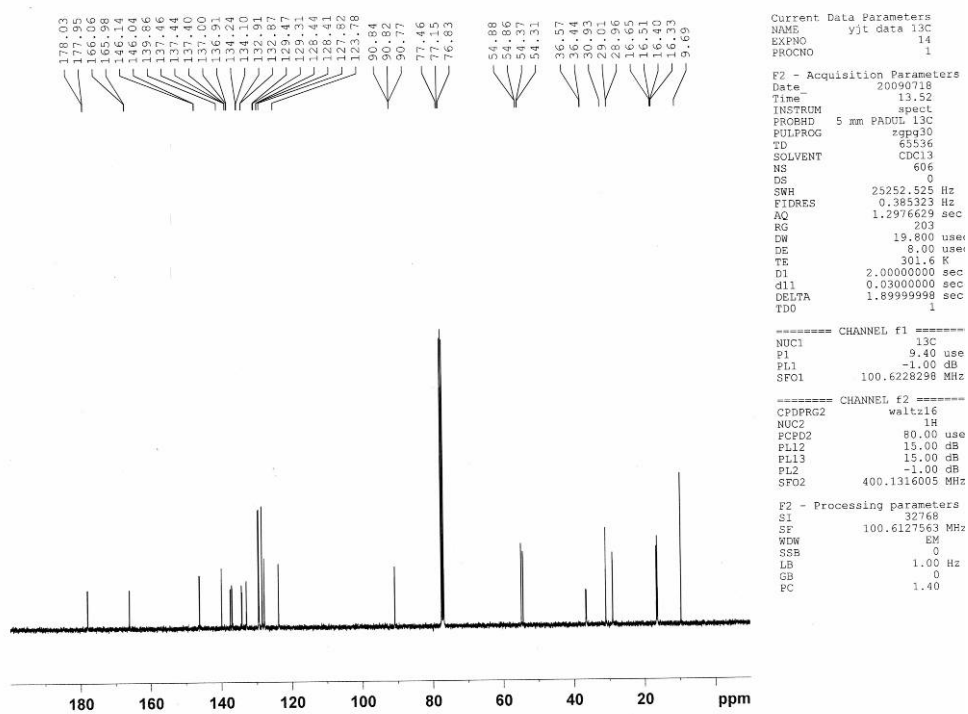



### 3. Titration experiment between fullerene and hosts

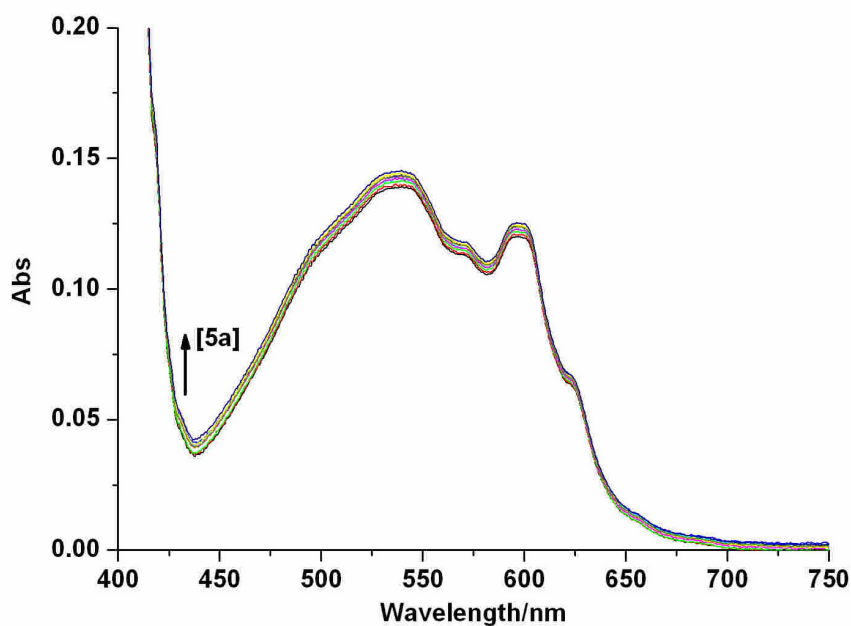

**Fig. S1** Absorption spectra of C<sub>60</sub> ( $1.60 \times 10^{-4}$  mol·dm<sup>-3</sup>) in the presence of **5a** in toluene at 25 °C. The concentrations of **5a** for the curves (from bottom to top) are: 0, 0.16, 0.32, 0.64, 0.96, 1.28, 1.60, 1.92,  $2.40 \times 10^{-4}$  mol·dm<sup>-3</sup>.

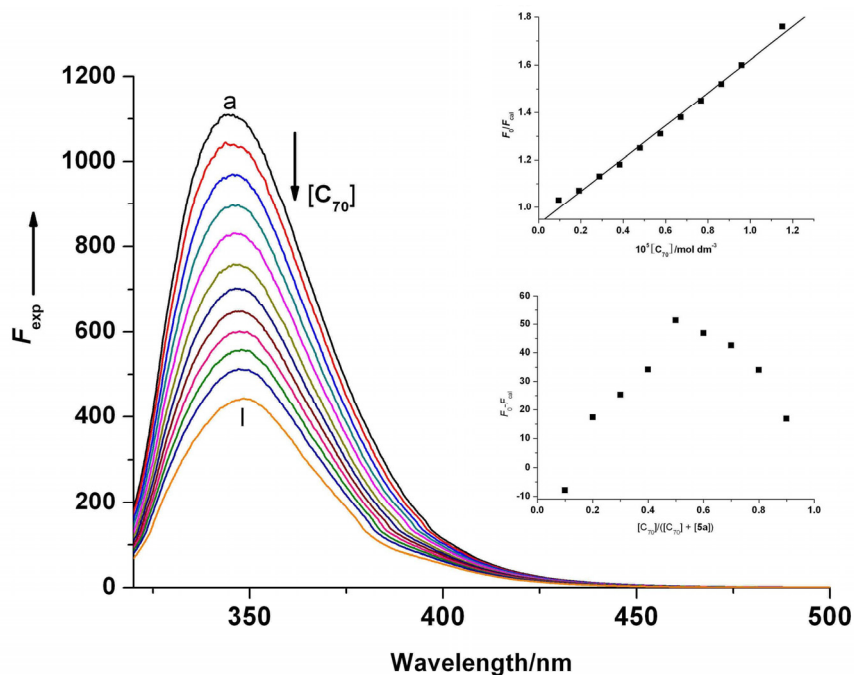

**Fig. S2** Emission spectra ( $\lambda_{\text{ex}} = 305$  nm,  $\lambda_{\text{em}} = 346$  nm.) of **5a** ( $3.2 \times 10^{-6}$  mol·dm<sup>-3</sup>) in the presence of C<sub>70</sub> in toluene at 25 °C. The concentrations of C<sub>70</sub> for curves a-l (from top to bottom) were 0, 0.096, 0.192, 0.288, 0.384, 0.480, 0.576, 0.672, 0.768, 0.864, 0.960, 1.152 ( $\times 10^{-5}$  mol·dm<sup>-3</sup>). Insets: The up inset was the variation of fluorescence intensity  $F_0/F_{\text{cal}}$  of **5a** with increasing of C<sub>70</sub> concentration. The down inset was the Job's plot for **5a**-C<sub>70</sub> complex in toluene solution ( $[5a] + [C_{70}] = 6.4 \times 10^{-6}$  mol·dm<sup>-3</sup>).

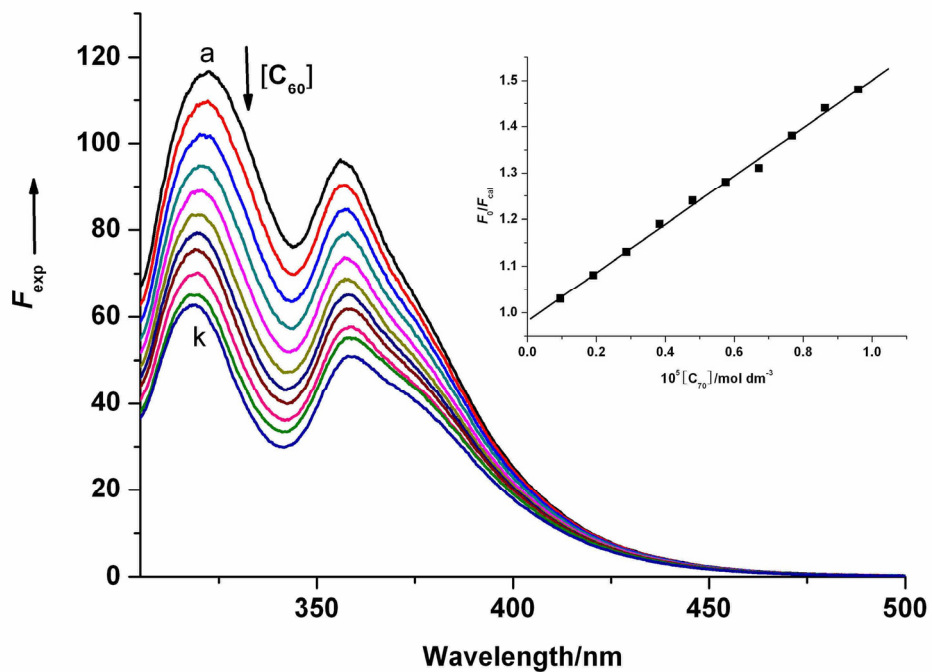

**Fig. S3** Emission spectra ( $\lambda_{\text{ex}} = 296 \text{ nm}$ ,  $\lambda_{\text{em}} = 322 \text{ nm}$ .) of CTV (**1**) ( $3.2 \times 10^{-6} \text{ mol} \cdot \text{dm}^{-3}$ ) in the presence of C<sub>60</sub> in toluene at 25 °C. The concentrations of C<sub>60</sub> for curves a-k (from top to bottom) were 0, 0.096, 0.192, 0.288, 0.384, 0.480, 0.576, 0.672, 0.768, 0.864, 0.960 ( $\times 10^{-5} \text{ mol} \cdot \text{dm}^{-3}$ ). The inset was the variation of fluorescence intensity  $F_0/F_{\text{cal}}$  of CTV with increasing of C<sub>60</sub> concentration.

#### 4. Molecular modeling of 5a-C<sub>60</sub>

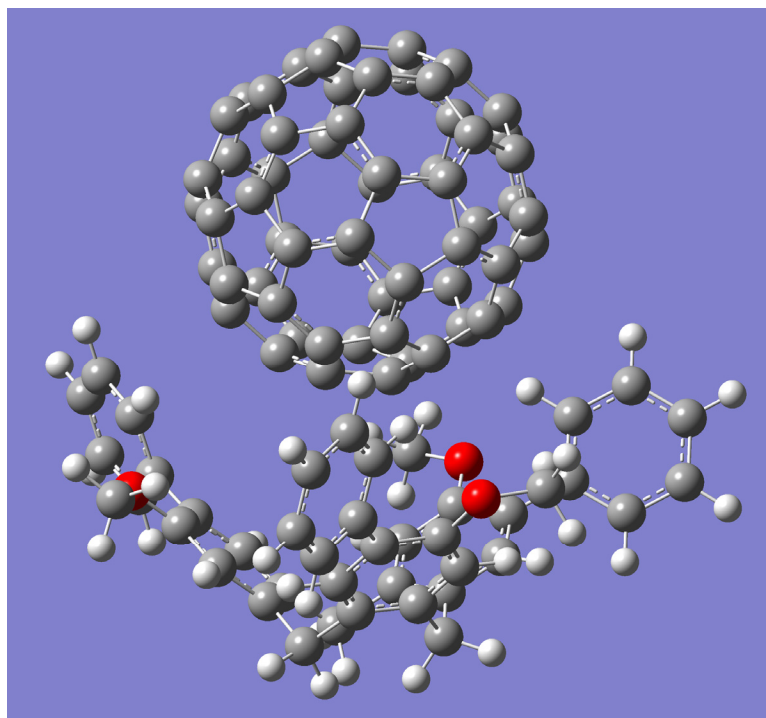

**Fig. S4** Molecular modeling of complex **5a** and C<sub>60</sub>. Based on the DFT(B3LYP, 3-21G) calculation results with Gaussian 09 software.

*Gaussian 09, Revision A.01*, M. J. Frisch, G. W. Trucks, H. B. Schlegel, G. E. Scuseria, M. A. Robb, J. R. Cheeseman, G. Scalmani, V. Barone, B. Mennucci, G. A. Petersson, H. Nakatsuji, M. Caricato, X. Li, H. P. Hratchian, A. F. Izmaylov, J. Bloino, G. Zheng, J. L. Sonnenberg, M. Hada, M. Ehara, K. Toyota, R. Fukuda, J. Hasegawa, M. Ishida, T. Nakajima, Y. Honda, O. Kitao, H. Nakai, T. Vreven, J. A. Montgomery, Jr., J. E. Peralta, F. Ogliaro, M. Bearpark, J. J. Heyd, E. Brothers, K. N. Kudin, V. N. Staroverov, R. Kobayashi, J. Normand, K. Raghavachari, A. Rendell, J. C. Burant, S. S. Iyengar, J. Tomasi, M. Cossi, N. Rega, J. M. Millam, M. Klene, J. E. Knox, J. B. Cross, V. Bakken, C. Adamo, J. Jaramillo, R. Gomperts, R. E. Stratmann, O. Yazyev, A. J. Austin, R. Cammi, C. Pomelli, J. W. Ochterski, R. L. Martin, K. Morokuma, V. G. Zakrzewski, G. A. Voth, P. Salvador, J. J. Dannenberg, S. Dapprich, A. D. Daniels, O. Farkas, J. B. Foresman, J. V. Ortiz, J. Cioslowski, and D. J. Fox, Gaussian, Inc., Wallingford CT, 2009.

## 5. Chiral HPLC trace of compound 6

### Chromatogram : yjt +- 1\_channel2

System : HPLC  
Method : 1-75-25  
User : Tian Hua

Acquired : 2008-10-21 12:50:18  
Processed : 2008-10-21 13:30:56  
Printed : 2009-7-10 20:01:08

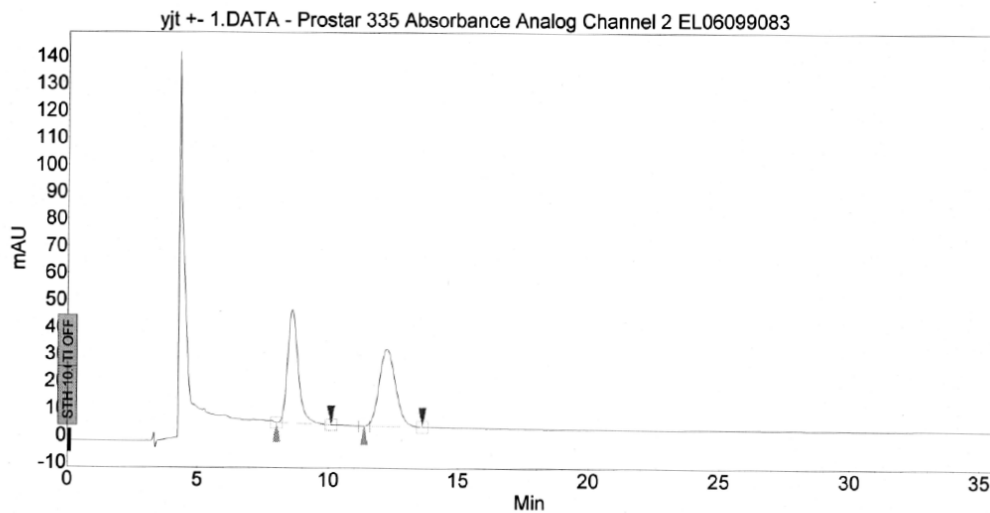

#### Peak results :

| Index | Name    | Time [Min] | Quantity [% Area] | Height [mAU] | Area [mAU.Min] | Area % [%] |
|-------|---------|------------|-------------------|--------------|----------------|------------|
| 1     | UNKNOWN | 8.61       | 48.97             | 41.9         | 19.7           | 48.967     |
| 2     | UNKNOWN | 12.24      | 51.03             | 28.4         | 20.5           | 51.033     |
| Total |         |            | 100.00            | 70.3         | 40.1           | 100.000    |

### Chromatogram : yjt +1\_channel2

System : HPLC  
Method : 1-75-25  
User : Tian Hua

Acquired : 2008-10-21 13:35:28  
Processed : 2008-10-21 14:00:53  
Printed : 2009-7-10 20:00:21

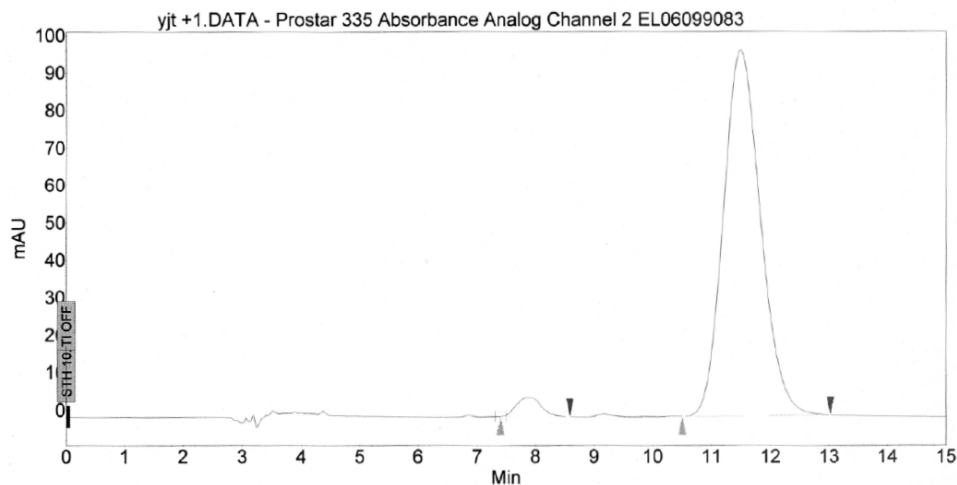

#### Peak results :

| Index | Name    | Time [Min] | Quantity [% Area] | Height [mAU] | Area [mAU.Min] | Area % [%] |
|-------|---------|------------|-------------------|--------------|----------------|------------|
| 1     | UNKNOWN | 7.92       | 3.38              | 5.0          | 2.5            | 3.383      |
| 2     | UNKNOWN | 11.49      | 96.62             | 97.5         | 71.4           | 96.617     |
| Total |         |            | 100.00            | 102.5        | 73.9           | 100.000    |

## Chromatogram : yjt -1\_channel1

System : HPLC  
Method : 1-75-25  
User : Tian Hua

Acquired : 2008-10-21 13:52:37  
Processed : 2008-10-21 14:36:15  
Printed : 2009-7-10 20:00:07

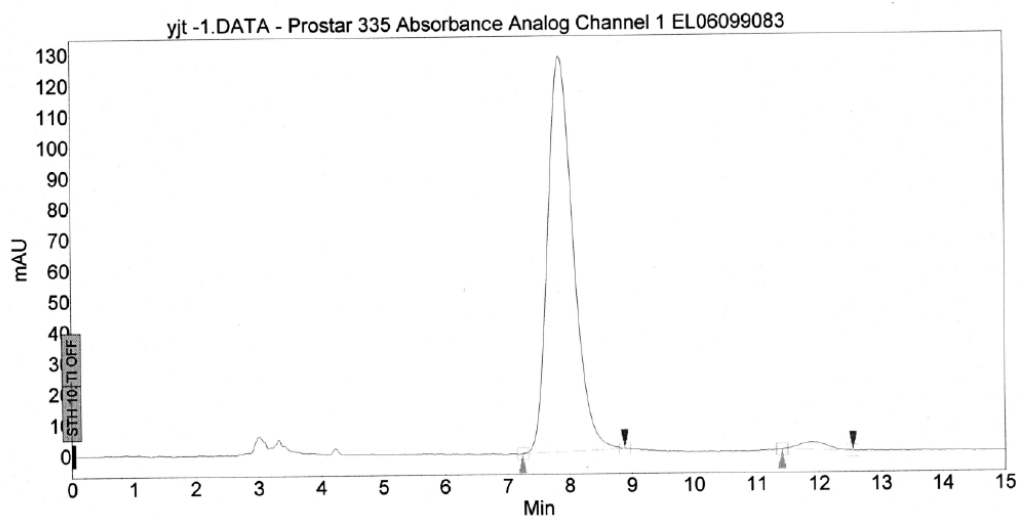

### Peak results :

| Index | Name    | Time [Min] | Quantity [% Area] | Height [mAU] | Area [mAU.Min] | Area % [%] |
|-------|---------|------------|-------------------|--------------|----------------|------------|
| 1     | UNKNOWN | 7.87       | 97.95             | 128.1        | 60.9           | 97.952     |
| 2     | UNKNOWN | 11.91      | 2.05              | 2.4          | 1.3            | 2.048      |
| Total |         |            | 100.00            | 130.6        | 62.1           | 100.000    |
